# Supplementary material
Source: PubMed Central journal article supplement (PMC10422925)
Supplement: audec22bsuppmat_bhac496.pdf [file audec22bsuppmat_bhac496.pdf]

---

## Auditory cortical connectivity in humans

### Supplementary Material

Cerebral Cortex (2022) doi: 10.1093/cercor/bhac496

Edmund T. Rolls<sup>1,2,6\*</sup>, Josef Rauschecker<sup>3</sup>, Gustavo Deco<sup>4,5</sup>, Chu-Chung Huang<sup>6</sup>, Jianfeng Feng<sup>2,7</sup>

1. Oxford Centre for Computational Neuroscience, Oxford, UK
2. Department of Computer Science, University of Warwick, Coventry, CV4 7AL, UK
3. Department of Neuroscience, Georgetown University Medical Center, Washington, DC 20057; and Institute for Advanced Study, Technical University Munich, Munich, Germany.
4. Center for Brain and Cognition, Computational Neuroscience Group, Department of Information and Communication Technologies, Universitat Pompeu Fabra, Roc Boronat 138, Barcelona, 08018, Spain; Brain and Cognition, Pompeu Fabra University, Barcelona, 08018, Spain.
5. Institució Catalana de la Recerca i Estudis Avançats (ICREA), Universitat Pompeu Fabra, Passeig Lluís Companys 23, Barcelona, 08010, Spain.
6. Shanghai Key Laboratory of Brain Functional Genomics (Ministry of Education), School of Psychology and Cognitive Science, East China Normal University, Shanghai 200602, China
7. Institute of Science and Technology for Brain Inspired Intelligence, Fudan University, Shanghai 200403, China

\*Corresponding author information:

Professor Edmund T. Rolls,

Department of Computer Science, University of Warwick, Coventry CV4 7AL, UK.

Email: [Edmund.Rolls@oxcns.org](mailto:Edmund.Rolls@oxcns.org)

URL: <https://www.oxcns.org>

<https://orcid.org/0000-0003-3025-1292>

---

### **Modified ordering of the HCP-MMP1 atlas**

The atlas used to define brain regions was the HCP-MMP1 surface-based atlas (Glasser et al. 2016), illustrated in Figs. 1 and S1. In the HCP-MMP1 atlas, each region has its RegionID, which we show in Table S1. Detailed information about the regions is available in the Supplementary Material File NIHMS68870-supplement-Neuroanatomical\_Supplementary\_Results.pdf provided by Glasser et al (2016). In that Supplementary Material file, a grouping of the regions is suggested based on geographic proximity and functional similarities, and this grouping is shown in the column labelled CortexID in Table S1. That has led to a different ordering of the regions, which we show in Table S1, with the original regionIDs from the HCP atlas shown in the column headed 'regionID'. This reordered version of the HCP-MMP1 atlas is described by Dr Dianne Patterson of the University of Arizona at <https://neuroimaging-core-docs.readthedocs.io/en/latest/pages/atlas.html>, where the following supporting files used to help generate Table S1 are available: HCP-MMP1\_UniqueRegionList.csv and Glasser\_2016\_Table.xlsx. We made file HCPMMP\_CortexID\_Ordering.xlsx from this, and this is available from the present authors. The connectivity matrices shown in the present paper used the ordering shown in Table S1, which is also used in the volumetric and extended form of this atlas (Huang et al. 2022).

**Table S1.** Regions defined in the modified Human Connectome Project atlas (Glasser *et al.* 2016). L=left hemisphere, R=right. The column ‘Reordered region ID’ is that used in Figs. 2-6, and is a reordering of that based on suggestions in the Supplementary Information of Glasser et al (2016). In that Supplementary Information of that paper, the 360 regions are grouped based on geographic proximity and functional similarities, which was reorganized and provided by Dr Dianne Patterson of the University of Arizona at <https://neuroimaging-core-docs.readthedocs.io/en/latest/pages/atlasses.html> with the HCP-MMP1\_UniqueRegionList.csv and is shown in the column labelled CortexID in Table S1. The volumes are in mm<sup>3</sup>. This modified atlas with the reordering is described elsewhere (Huang *et al.* 2022).

| Reordered ID (L, R) | Region | RegionLongName                   | Cortical Division     | Cortex ID | Original ID | Voxel numbers (1mm <sup>3</sup> ) (L,R) |
|---------------------|--------|----------------------------------|-----------------------|-----------|-------------|-----------------------------------------|
| 1, 181              | V1     | Primary_Visual_Cortex            | Primary_Visual        | 1         | 1           | 13812, 13406                            |
| 2, 182              | V2     | Second_Visual_Area               | Early_Visual          | 2         | 4           | 9515, 9420                              |
| 3, 183              | V3     | Third_Visual_Area                | Early_Visual          | 2         | 5           | 7106, 7481                              |
| 4, 184              | V4     | Fourth_Visual_Area               | Early_Visual          | 2         | 6           | 4782, 4537                              |
| 5, 185              | IPS1   | IntraParietal_Sulcus_Area_1      | Dorsal_Stream_Visual  | 3         | 17          | 1751, 1750                              |
| 6, 186              | V3A    | Area_V3A                         | Dorsal_Stream_Visual  | 3         | 13          | 2191, 2212                              |
| 7, 187              | V3B    | Area_V3B                         | Dorsal_Stream_Visual  | 3         | 19          | 639, 731                                |
| 8, 188              | V6     | Sixth_Visual_Area                | Dorsal_Stream_Visual  | 3         | 3           | 1402, 1559                              |
| 9, 189              | V6A    | Area_V6A                         | Dorsal_Stream_Visual  | 3         | 152         | 904, 734                                |
| 10, 190             | V7     | Seventh_Visual_Area              | Dorsal_Stream_Visual  | 3         | 16          | 1005, 1041                              |
| 11, 191             | FFC    | Fusiform_Face_Complex            | Ventral_Stream_Visual | 4         | 18          | 3848, 4402                              |
| 12, 192             | PIT    | Posterior_InferoTemporal_complex | Ventral_Stream_Visual | 4         | 22          | 1392, 1386                              |
| 13, 193             | V8     | Eighth_Visual_Area               | Ventral_Stream_Visual | 4         | 7           | 1361, 1175                              |
| 14, 194             | VMV1   | Ventromedial_Visual_Area_1       | Ventral_Stream_Visual | 4         | 153         | 939, 1219                               |
| 15, 195             | VMV2   | Ventromedial_Visual_Area_2       | Ventral_Stream_Visual | 4         | 160         | 639, 923                                |
| 16, 196             | VMV3   | Ventromedial_Visual_Area_3       | Ventral_Stream_Visual | 4         | 154         | 941, 1242                               |
| 17, 197             | VVC    | Ventral_Visual_Complex           | Ventral_Stream_Visual | 4         | 163         | 2487, 2753                              |
| 18, 198             | FST    | Area_FST                         | MT+_Complex           | 5         | 157         | 1324, 1683                              |
| 19, 199             | LO1    | Area_Lateral_Occipital_1         | MT+_Complex           | 5         | 20          | 619, 909                                |
| 20, 200             | LO2    | Area_Lateral_Occipital_2         | MT+_Complex           | 5         | 21          | 1179, 1062                              |
| 21, 201             | LO3    | Area_Lateral_Occipital_3         | MT+_Complex           | 5         | 159         | 438, 915                                |
| 22, 202             | MST    | Medial_Superior_Temporal_Area    | MT+_Complex           | 5         | 2           | 794, 1036                               |
| 23, 203             | MT     | Middle_Temporal_Area             | MT+_Complex           | 5         | 23          | 620, 1005                               |
| 24, 204             | PH     | Area_PH                          | MT+_Complex           | 5         | 138         | 3453, 3205                              |
| 25, 205             | V3CD   | Area_V3CD                        | MT+_Complex           | 5         | 158         | 876, 1222                               |
| 26, 206             | V4t    | Area_V4t                         | MT+_Complex           | 5         | 156         | 1037, 1249                              |
| 27, 207             | 1      | Area_1                           | SomaSens_Motor        | 6         | 51          | 6590, 5925                              |
| 28, 208             | 2      | Area_2                           | SomaSens_Motor        | 6         | 52          | 4278, 4727                              |
| 29, 209             | 3a     | Area_3a                          | SomaSens_Motor        | 6         | 53          | 2247, 2286                              |
| 30, 210             | 3b     | Primary_Sensory_Cortex           | SomaSens_Motor        | 6         | 9           | 5451, 4350                              |
| 31, 211             | 4      | Primary_Motor_Cortex             | SomaSens_Motor        | 6         | 8           | 10776, 10254                            |
| 32, 212             | 23c    | Area_23c                         | ParaCentral_MidCing   | 7         | 38          | 2259, 2498                              |
| 33, 213             | 24dd   | Dorsal_Area_24d                  | ParaCentral_MidCing   | 7         | 40          | 2665, 2820                              |
| 34, 214             | 24dv   | Ventral_Area_24d                 | ParaCentral_MidCing   | 7         | 41          | 1076, 1349                              |
| 35, 215             | 5L     | Area_5L                          | ParaCentral_MidCing   | 7         | 39          | 2249, 2327                              |
| 36, 216             | 5m     | Area_5m                          | ParaCentral_MidCing   | 7         | 36          | 1483, 2079                              |

|         |       |                                       |                      |    |     |            |
|---------|-------|---------------------------------------|----------------------|----|-----|------------|
| 37, 217 | 5mv   | Area_5m_ventral                       | ParaCentral_MidCing  | 7  | 37  | 1651, 1996 |
| 38, 218 | 6ma   | Area_6m_anterior                      | ParaCentral_MidCing  | 7  | 44  | 3941, 4251 |
| 39, 219 | 6mp   | Area_6mp                              | ParaCentral_MidCing  | 7  | 55  | 3701, 3105 |
| 40, 220 | SCEF  | Supplementary_and_Cingulate_Eye_Field | ParaCentral_MidCing  | 7  | 43  | 3500, 3371 |
| 41, 221 | 55b   | Area_55b                              | Premotor             | 8  | 12  | 2422, 1537 |
| 42, 222 | 6a    | Area_6_anterior                       | Premotor             | 8  | 96  | 4233, 3752 |
| 43, 223 | 6d    | Dorsal_area_6                         | Premotor             | 8  | 54  | 2916, 2909 |
| 44, 224 | 6r    | Rostral_Area_6                        | Premotor             | 8  | 78  | 3029, 3981 |
| 45, 225 | 6v    | Ventral_Area_6                        | Premotor             | 8  | 56  | 2075, 2516 |
| 46, 226 | FEF   | Frontal_Eye_Fields                    | Premotor             | 8  | 10  | 1787, 1889 |
| 47, 227 | PEF   | Premotor_Eye_Field                    | Premotor             | 8  | 11  | 1006, 1258 |
| 48, 228 | 43    | Area_43                               | Posterior_Opercular  | 9  | 99  | 1889, 1678 |
| 49, 229 | FOP1  | Frontal_Opercular_Area_1              | Posterior_Opercular  | 9  | 113 | 879, 932   |
| 50, 230 | OP1   | Area_OP1-SII                          | Posterior_Opercular  | 9  | 101 | 1275, 1072 |
| 51, 231 | OP2-3 | Area_OP2-3-VS                         | Posterior_Opercular  | 9  | 102 | 943, 792   |
| 52, 232 | OP4   | Area_OP4-PV                           | Posterior_Opercular  | 9  | 100 | 2332, 2409 |
| 53, 233 | 52    | Area_52                               | Early_Auditory       | 10 | 103 | 725, 580   |
| 54, 234 | A1    | Primary_Auditory_Cortex               | Early_Auditory       | 10 | 24  | 1023, 796  |
| 55, 235 | LBelt | Lateral_Belt_Complex                  | Early_Auditory       | 10 | 174 | 820, 901   |
| 56, 236 | MBelt | Medial_Belt_Complex                   | Early_Auditory       | 10 | 173 | 1242, 1236 |
| 57, 237 | PBelt | ParaBelt_Complex                      | Early_Auditory       | 10 | 124 | 1719, 1439 |
| 58, 238 | PFcm  | Area_PFcm                             | Early_Auditory       | 10 | 105 | 1486, 1485 |
| 59, 239 | RI    | RetroInsular_Cortex                   | Early_Auditory       | 10 | 104 | 1149, 1334 |
| 60, 240 | A4    | Auditory_4_Complex                    | Auditory_Association | 11 | 175 | 3514, 3610 |
| 61, 241 | A5    | Auditory_5_Complex                    | Auditory_Association | 11 | 125 | 3346, 3881 |
| 62, 242 | STGa  | Area_STGa                             | Auditory_Association | 11 | 123 | 2509, 2187 |
| 63, 243 | STSda | Area_STSd_anterior                    | Auditory_Association | 11 | 128 | 1944, 2389 |
| 64, 244 | STSdp | Area_STSd_posterior                   | Auditory_Association | 11 | 129 | 1994, 2605 |
| 65, 245 | STSva | Area_STSv_anterior                    | Auditory_Association | 11 | 176 | 1694, 1900 |
| 66, 246 | STSvp | Area_STSv_posterior                   | Auditory_Association | 11 | 130 | 2898, 2515 |
| 67, 247 | TA2   | Area_TA2                              | Auditory_Association | 11 | 107 | 1518, 1726 |
| 68, 248 | AAIC  | Anterior_Agranular_Insula_Complex     | Insula_FrontalOperc  | 12 | 112 | 1859, 1691 |
| 69, 249 | AVI   | Anterior_Ventral_Insular_Area         | Insula_FrontalOperc  | 12 | 111 | 1446, 1792 |
| 70, 250 | FOP2  | Frontal_Opercular_Area_2              | Insula_FrontalOperc  | 12 | 115 | 750, 720   |
| 71, 251 | FOP3  | Frontal_Opercular_Area_3              | Insula_FrontalOperc  | 12 | 114 | 754, 614   |
| 72, 252 | FOP4  | Frontal_Opercular_Area_4              | Insula_FrontalOperc  | 12 | 108 | 2522, 1678 |
| 73, 253 | FOP5  | Area_Frontal_Opercular_5              | Insula_FrontalOperc  | 12 | 169 | 1297, 1365 |
| 74, 254 | Ig    | Insular_Granular_Complex              | Insula_FrontalOperc  | 12 | 168 | 841, 1077  |
| 75, 255 | MI    | Middle_Insular_Area                   | Insula_FrontalOperc  | 12 | 109 | 2102, 1960 |
| 76, 256 | PI    | Para-Insular_Area                     | Insula_FrontalOperc  | 12 | 178 | 1033, 1058 |
| 77, 257 | Pir   | Piriform_Cortex                       | Insula_FrontalOperc  | 12 | 110 | 2287, 1856 |
| 78, 258 | PoI1  | Area_Posterior_Insular_1              | Insula_FrontalOperc  | 12 | 167 | 1811, 1835 |
| 79, 259 | PoI2  | Posterior_Insular_Area_2              | Insula_FrontalOperc  | 12 | 106 | 2747, 2675 |
| 80, 260 | H     | Hippocampus                           | Medial_Temporal      | 13 | 120 | 4283, 3626 |
| 81, 261 | PreS  | PreSubiculum                          | Medial_Temporal      | 13 | 119 | 1817, 1558 |
| 82, 262 | EC    | Entorhinal_Cortex                     | Medial_Temporal      | 13 | 118 | 2127, 2110 |
| 83, 263 | PeEc  | Perirhinal_Ectorhinal_Cortex          | Medial_Temporal      | 13 | 122 | 4826, 4755 |

|          |       |                                         |                     |    |     |              |
|----------|-------|-----------------------------------------|---------------------|----|-----|--------------|
| 84, 264  | TF    | Area_TF                                 | Medial_Temporal     | 13 | 135 | 3986, 4752   |
| 85, 265  | PHA1  | ParaHippocampal_Area_1                  | Medial_Temporal     | 13 | 126 | 1281, 1168   |
| 86, 266  | PHA2  | ParaHippocampal_Area_2                  | Medial_Temporal     | 13 | 155 | 783, 771     |
| 87, 267  | PHA3  | ParaHippocampal_Area_3                  | Medial_Temporal     | 13 | 127 | 2023, 1122   |
| 88, 268  | PHT   | Area_PHT                                | Lateral_Temporal    | 14 | 137 | 4182, 3410   |
| 89, 269  | TE1a  | Area_TE1_anterior                       | Lateral_Temporal    | 14 | 132 | 5227, 4180   |
| 90, 270  | TE1m  | Area_TE1_Middle                         | Lateral_Temporal    | 14 | 177 | 3339, 3429   |
| 91, 271  | TE1p  | Area_TE1_posterior                      | Lateral_Temporal    | 14 | 133 | 7116, 6010   |
| 92, 272  | TE2a  | Area_TE2_anterior                       | Lateral_Temporal    | 14 | 134 | 5691, 5753   |
| 93, 273  | TE2p  | Area_TE2_posterior                      | Lateral_Temporal    | 14 | 136 | 4115, 3040   |
| 94, 274  | TGd   | Area_TG_dorsal                          | Lateral_Temporal    | 14 | 131 | 10192, 10269 |
| 95, 275  | TGv   | Area_TG_Ventral                         | Lateral_Temporal    | 14 | 172 | 3694, 4515   |
| 96, 276  | PSL   | PeriSylvian_Language_Area               | TPO                 | 15 | 25  | 2154, 2759   |
| 97, 277  | STV   | Superior_Temporal_Visual_Area           | TPO                 | 15 | 28  | 2322, 2294   |
| 98, 278  | TPOJ1 | Area_TemporoParietoOccipital_Junction_1 | TPO                 | 15 | 139 | 2102, 3938   |
| 99, 279  | TPOJ2 | Area_TemporoParietoOccipital_Junction_2 | TPO                 | 15 | 140 | 1930, 2068   |
| 100, 280 | TPOJ3 | Area_TemporoParietoOccipital_Junction_3 | TPO                 | 15 | 141 | 1290, 1277   |
| 101, 281 | 7AL   | Lateral_Area_7A                         | Superior_Parietal   | 16 | 42  | 2134, 2030   |
| 102, 282 | 7Am   | Medial_Area_7A                          | Superior_Parietal   | 16 | 45  | 2995, 2379   |
| 103, 283 | 7PC   | Area_7PC                                | Superior_Parietal   | 16 | 47  | 3151, 3415   |
| 104, 284 | 7PL   | Lateral_Area_7P                         | Superior_Parietal   | 16 | 46  | 1695, 1363   |
| 105, 285 | 7Pm   | Medial_Area_7P                          | Superior_Parietal   | 16 | 29  | 1601, 1308   |
| 106, 286 | AIP   | Anterior_IntraParietal_Area             | Superior_Parietal   | 16 | 117 | 1999, 2542   |
| 107, 287 | LIPd  | Area_Lateral_IntraParietal_dorsal       | Superior_Parietal   | 16 | 95  | 1008, 869    |
| 108, 288 | LIPv  | Area_Lateral_IntraParietal_ventral      | Superior_Parietal   | 16 | 48  | 1681, 1783   |
| 109, 289 | MIP   | Medial_IntraParietal_Area               | Superior_Parietal   | 16 | 50  | 1872, 2403   |
| 110, 290 | VIP   | Ventral_IntraParietal_Complex           | Superior_Parietal   | 16 | 49  | 1890, 1577   |
| 111, 291 | IP0   | Area_IntraParietal_0                    | Inferior_Parietal   | 17 | 146 | 1203, 1239   |
| 112, 292 | IP1   | Area_IntraParietal_1                    | Inferior_Parietal   | 17 | 145 | 1692, 1632   |
| 113, 293 | IP2   | Area_IntraParietal_2                    | Inferior_Parietal   | 17 | 144 | 2102, 1861   |
| 114, 294 | PF    | Area_PF_Complex                         | Inferior_Parietal   | 17 | 148 | 5457, 5251   |
| 115, 295 | PFm   | Area_PFm_Complex                        | Inferior_Parietal   | 17 | 149 | 8220, 8141   |
| 116, 296 | PFop  | Area_PF_Opercular                       | Inferior_Parietal   | 17 | 147 | 1797, 1783   |
| 117, 297 | PFt   | Area_PFt                                | Inferior_Parietal   | 17 | 116 | 1983, 2039   |
| 118, 298 | PGi   | Area_PGi                                | Inferior_Parietal   | 17 | 150 | 4791, 4970   |
| 119, 299 | PGp   | Area_PGp                                | Inferior_Parietal   | 17 | 143 | 2501, 3740   |
| 120, 300 | PGs   | Area_PGs                                | Inferior_Parietal   | 17 | 151 | 4552, 3366   |
| 121, 301 | 23d   | Area_23d                                | Posterior_Cingulate | 18 | 32  | 1261, 1513   |
| 122, 302 | 31a   | Area_31a                                | Posterior_Cingulate | 18 | 162 | 1260, 1116   |
| 123, 303 | 31pd  | Area_31pd                               | Posterior_Cingulate | 18 | 161 | 1428, 864    |
| 124, 304 | 31pv  | Area_31p_ventral                        | Posterior_Cingulate | 18 | 35  | 950, 1022    |
| 125, 305 | 7m    | Area_7m                                 | Posterior_Cingulate | 18 | 30  | 2128, 2067   |
| 126, 306 | d23ab | Area_dorsal_23_a+b                      | Posterior_Cingulate | 18 | 34  | 1607, 1106   |
| 127, 307 | DVT   | Dorsal_Transitional_Visual_Area         | Posterior_Cingulate | 18 | 142 | 1806, 2176   |
| 128, 308 | PCV   | PreCuneus_Visual_Area                   | Posterior_Cingulate | 18 | 27  | 2245, 2416   |
| 129, 309 | POS1  | Parieto-Occipital_Sulcus_Area_1         | Posterior_Cingulate | 18 | 31  | 2531, 2727   |

|          |        |                                 |                         |    |     |            |
|----------|--------|---------------------------------|-------------------------|----|-----|------------|
| 130, 310 | POS2   | Parieto-Occipital_Sulcus_Area_2 | Posterior_Cingulate     | 18 | 15  | 3261, 3093 |
| 131, 311 | ProS   | ProStriate_Area                 | Posterior_Cingulate     | 18 | 121 | 1222, 1055 |
| 132, 312 | RSC    | RetroSplenial_Complex           | Posterior_Cingulate     | 18 | 14  | 2830, 3067 |
| 133, 313 | v23ab  | Area_ventral_23_a+b             | Posterior_Cingulate     | 18 | 33  | 916, 1089  |
| 134, 314 | 10r    | Area_10r                        | AntCing_MedPFC          | 19 | 65  | 1589, 1053 |
| 135, 315 | 10v    | Area_10v                        | AntCing_MedPFC          | 19 | 88  | 3906, 2667 |
| 136, 316 | 25     | Area_25                         | AntCing_MedPFC          | 19 | 164 | 1911, 2135 |
| 137, 317 | 33pr   | Area_33_prime                   | AntCing_MedPFC          | 19 | 58  | 1354, 1316 |
| 138, 318 | 8BM    | Area_8BM                        | AntCing_MedPFC          | 19 | 63  | 3122, 3436 |
| 139, 319 | 9m     | Area_9_Middle                   | AntCing_MedPFC          | 19 | 69  | 6338, 5881 |
| 140, 320 | a24    | Area_a24                        | AntCing_MedPFC          | 19 | 61  | 2085, 2152 |
| 141, 321 | a24pr  | Anterior_24_prime               | AntCing_MedPFC          | 19 | 59  | 1095, 1474 |
| 142, 322 | a32pr  | Area_anterior_32_prime          | AntCing_MedPFC          | 19 | 179 | 1759, 1118 |
| 143, 323 | d32    | Area_dorsal_32                  | AntCing_MedPFC          | 19 | 62  | 2228, 2374 |
| 144, 324 | p24    | Area_posterior_24               | AntCing_MedPFC          | 19 | 180 | 2394, 2442 |
| 145, 325 | p24pr  | Area_Posterior_24_prime         | AntCing_MedPFC          | 19 | 57  | 1422, 1724 |
| 146, 326 | p32    | Area_p32                        | AntCing_MedPFC          | 19 | 64  | 1180, 1765 |
| 147, 327 | p32pr  | Area_p32_prime                  | AntCing_MedPFC          | 19 | 60  | 1569, 1305 |
| 148, 328 | pOFC   | Posterior_OFC_Complex           | AntCing_MedPFC          | 19 | 166 | 2486, 2836 |
| 149, 329 | s32    | Area_s32                        | AntCing_MedPFC          | 19 | 165 | 604, 1015  |
| 150, 330 | 10d    | Area_10d                        | OrbPolaFrontal          | 20 | 72  | 3644, 3096 |
| 151, 331 | 10pp   | Polar_10p                       | OrbPolaFrontal          | 20 | 90  | 1997, 2487 |
| 152, 332 | 11l    | Area_11l                        | OrbPolaFrontal          | 20 | 91  | 3531, 3793 |
| 153, 333 | 13l    | Area_13l                        | OrbPolaFrontal          | 20 | 92  | 2429, 1757 |
| 154, 334 | 47m    | Area_47m                        | OrbPolaFrontal          | 20 | 66  | 799, 781   |
| 155, 335 | 47s    | Area_47s                        | OrbPolaFrontal          | 20 | 94  | 2795, 3080 |
| 156, 336 | a10p   | Area_anterior_10p               | OrbPolaFrontal          | 20 | 89  | 1964, 1748 |
| 157, 337 | OFC    | Orbital_Frontal_Complex         | OrbPolaFrontal          | 20 | 93  | 4560, 5232 |
| 158, 338 | p10p   | Area_posterior_10p              | OrbPolaFrontal          | 20 | 170 | 2116, 2365 |
| 159, 339 | 44     | Area_44                         | Inferior_Frontal        | 21 | 74  | 2435, 2589 |
| 160, 340 | 45     | Area_45                         | Inferior_Frontal        | 21 | 75  | 3762, 2962 |
| 161, 341 | 47l    | Area_47l_(47_lateral)           | Inferior_Frontal        | 21 | 76  | 2527, 2592 |
| 162, 342 | a47r   | Area_anterior_47r               | Inferior_Frontal        | 21 | 77  | 4167, 3763 |
| 163, 343 | IFJa   | Area_IFJa                       | Inferior_Frontal        | 21 | 79  | 1513, 1405 |
| 164, 344 | IFJp   | Area_IFJp                       | Inferior_Frontal        | 21 | 80  | 960, 740   |
| 165, 345 | IFSa   | Area_IFSa                       | Inferior_Frontal        | 21 | 82  | 2057, 2641 |
| 166, 346 | IFSp   | Area_IFSp                       | Inferior_Frontal        | 21 | 81  | 1589, 1730 |
| 167, 347 | p47r   | Area_posterior_47r              | Inferior_Frontal        | 21 | 171 | 2133, 1761 |
| 168, 348 | 46     | Area_46                         | Dorsolateral_Prefrontal | 22 | 84  | 4863, 4394 |
| 169, 349 | 8Ad    | Area_8Ad                        | Dorsolateral_Prefrontal | 22 | 68  | 3386, 3492 |
| 170, 350 | 8Av    | Area_8Av                        | Dorsolateral_Prefrontal | 22 | 67  | 4807, 5902 |
| 171, 351 | 8BL    | Area_8B_Lateral                 | Dorsolateral_Prefrontal | 22 | 70  | 3377, 4078 |
| 172, 352 | 8C     | Area_8C                         | Dorsolateral_Prefrontal | 22 | 73  | 4085, 3134 |
| 173, 353 | 9-46d  | Area_9-46d                      | Dorsolateral_Prefrontal | 22 | 86  | 4534, 4666 |
| 174, 354 | 9a     | Area_9_anterior                 | Dorsolateral_Prefrontal | 22 | 87  | 3706, 3048 |
| 175, 355 | 9p     | Area_9_Posterior                | Dorsolateral_Prefrontal | 22 | 71  | 3426, 2488 |
| 176, 356 | a9-46v | Area_anterior_9-46v             | Dorsolateral_Prefrontal | 22 | 85  | 3314, 2628 |

|          |        |                                |                         |    |    |            |
|----------|--------|--------------------------------|-------------------------|----|----|------------|
| 177, 357 | i6-8   | Inferior_6-8_Transitional_Area | Dorsolateral_Prefrontal | 22 | 97 | 1764, 2418 |
| 178, 358 | p9-46v | Area_posterior_9-46v           | Dorsolateral_Prefrontal | 22 | 83 | 2871, 4635 |
| 179, 359 | s6-8   | Superior_6-8_Transitional_Area | Dorsolateral_Prefrontal | 22 | 98 | 1336, 2132 |
| 180, 360 | SFL    | Superior_Frontal_Language_Area | Dorsolateral_Prefrontal | 22 | 26 | 3873, 3055 |

Column 1 (Reordered ID) shows the order in HCPex based on the HCP-MMP1\_UniqueRegionList.csv, as described in the Methods, of the 360 cortical regions originally defined by Glasser et al (2016). The names of the cortical divisions shown in column 4 come from the same .csv file. The sixth column shows the original order used by Glasser et al (2016). Abbreviations: L=left hemisphere, R=right. MT+ Complex, MT+ Complex\_and\_Neighboring\_Visual\_Areas; SomaSens\_Motor, Somatosensory\_and\_Motor; ParaCentral\_MidCing, Paracentral\_Lobular\_and\_Mid\_Cingulate; Insula\_FrontalOperc, Insular\_and\_Frontal\_Opercular; TPO, Temporo-Parieto-Occipital\_Junction; AntCing\_MedPFC, Anterior\_Cingulate\_and\_Medial\_Prefrontal; OrbPolaFrontal, Orbital\_and\_Polar\_Frontal.

**Table S2. The subcortical regions in the extended HCPex atlas (Huang, Rolls et al (2022)).**

| <b>ID (L,R)</b> | <b>Abbreviation</b> | <b>Full Name</b>                          | <b>Voxel numbers (1mm3) (L,R)</b> |
|-----------------|---------------------|-------------------------------------------|-----------------------------------|
| 361, 394        | AV                  | Thalamus: Anteroventral Nucleus           | 256, 280                          |
| 362, 395        | CeM                 | Thalamus: Central medial                  | 96, 88                            |
| 363, 396        | CL                  | Thalamus: Central lateral                 | 16, 16                            |
| 364, 397        | CM                  | Thalamus: Centralmedian                   | 424, 376                          |
| 365, 398        | LD                  | Thalamus: Laterodorsal                    | 48, 8                             |
| 366, 399        | LGN                 | Thalamus: Lateral Geniculate              | 328, 256                          |
| 367, 400        | LP                  | Thalamus: Lateral Posterior               | 256, 264                          |
| 368, 401        | L-Sg                | Thalamus: Limitans Suprageniculate        | 32, 16                            |
| 369, 402        | MDI                 | Thalamus: Mediodorsolateral parvocellular | 328, 320                          |
| 370, 403        | MDm                 | Thalamus: Mediodorsomedial magnocellular  | 1104, 1192                        |
| 371, 404        | MGN                 | Thalamus: Medial Geniculate               | 160, 168                          |
| 372, 405        | MV(Re)              | Thalamus: Reuniens                        | 8, 8                              |
| 373, 406        | Pf                  | Thalamus: Parafascicular                  | 56, 72                            |
| 374, 407        | PuA                 | Thalamus: Pulvinar anterior               | 320, 280                          |
| 375, 408        | PuI                 | Thalamus: Pulvinar inferior               | 336, 280                          |
| 376, 409        | PuL                 | Thalamus: Pulvinar lateral                | 304, 256                          |
| 377, 410        | PuM                 | Thalamus: Pulvinar medial                 | 1904, 1680                        |
| 378, 411        | VA                  | Thalamus: Ventral Anterior                | 608, 616                          |
| 379, 412        | VLa                 | Thalamus: Ventral Lateral Anterior        | 880, 856                          |
| 380, 413        | VLP                 | Thalamus: Ventral Lateral Posterior       | 1384, 1288                        |
| 381, 414        | VPL                 | Thalamus: Ventral posterolateral          | 1600, 1368                        |
| 382, 415        | Putam               | Putamen                                   | 7896, 7744                        |
| 383, 416        | Caud                | Caudate                                   | 6896, 6952                        |
| 384, 417        | NAc                 | Nucleus Accumbens                         | 600, 632                          |
| 385, 418        | Gpe                 | Globus pallidus externalis                | 1232, 1144                        |
| 386, 419        | Gpi                 | Globus pallidus internalis                | 632, 624                          |
| 387, 420        | Amyg                | Amygdala                                  | 1608, 1632                        |
| 388, 421        | SNpc                | Substantia nigra pars compacta            | 184, 200                          |
| 389, 422        | SNpr                | Substantia nigra pars reticulata          | 408, 440                          |
| 390, 423        | VTA                 | Ventral tegmental area                    | 40, 48                            |
| 391, 424        | MB                  | Mammillary bodies                         | 112, 104                          |
| 392, 425        | Septum              | Septal nuclei                             | 248, 136                          |
| 393, 426        | Nb                  | Nucleus basalis                           | 584, 600                          |





Fig. S1-2. Example coronal slices showing regions defined in the HCPex atlas and added subcortical regions (Huang *et al.* 2022). The abbreviations are as in Table S1. The y values for the coronal slices are in MNI coordinates.

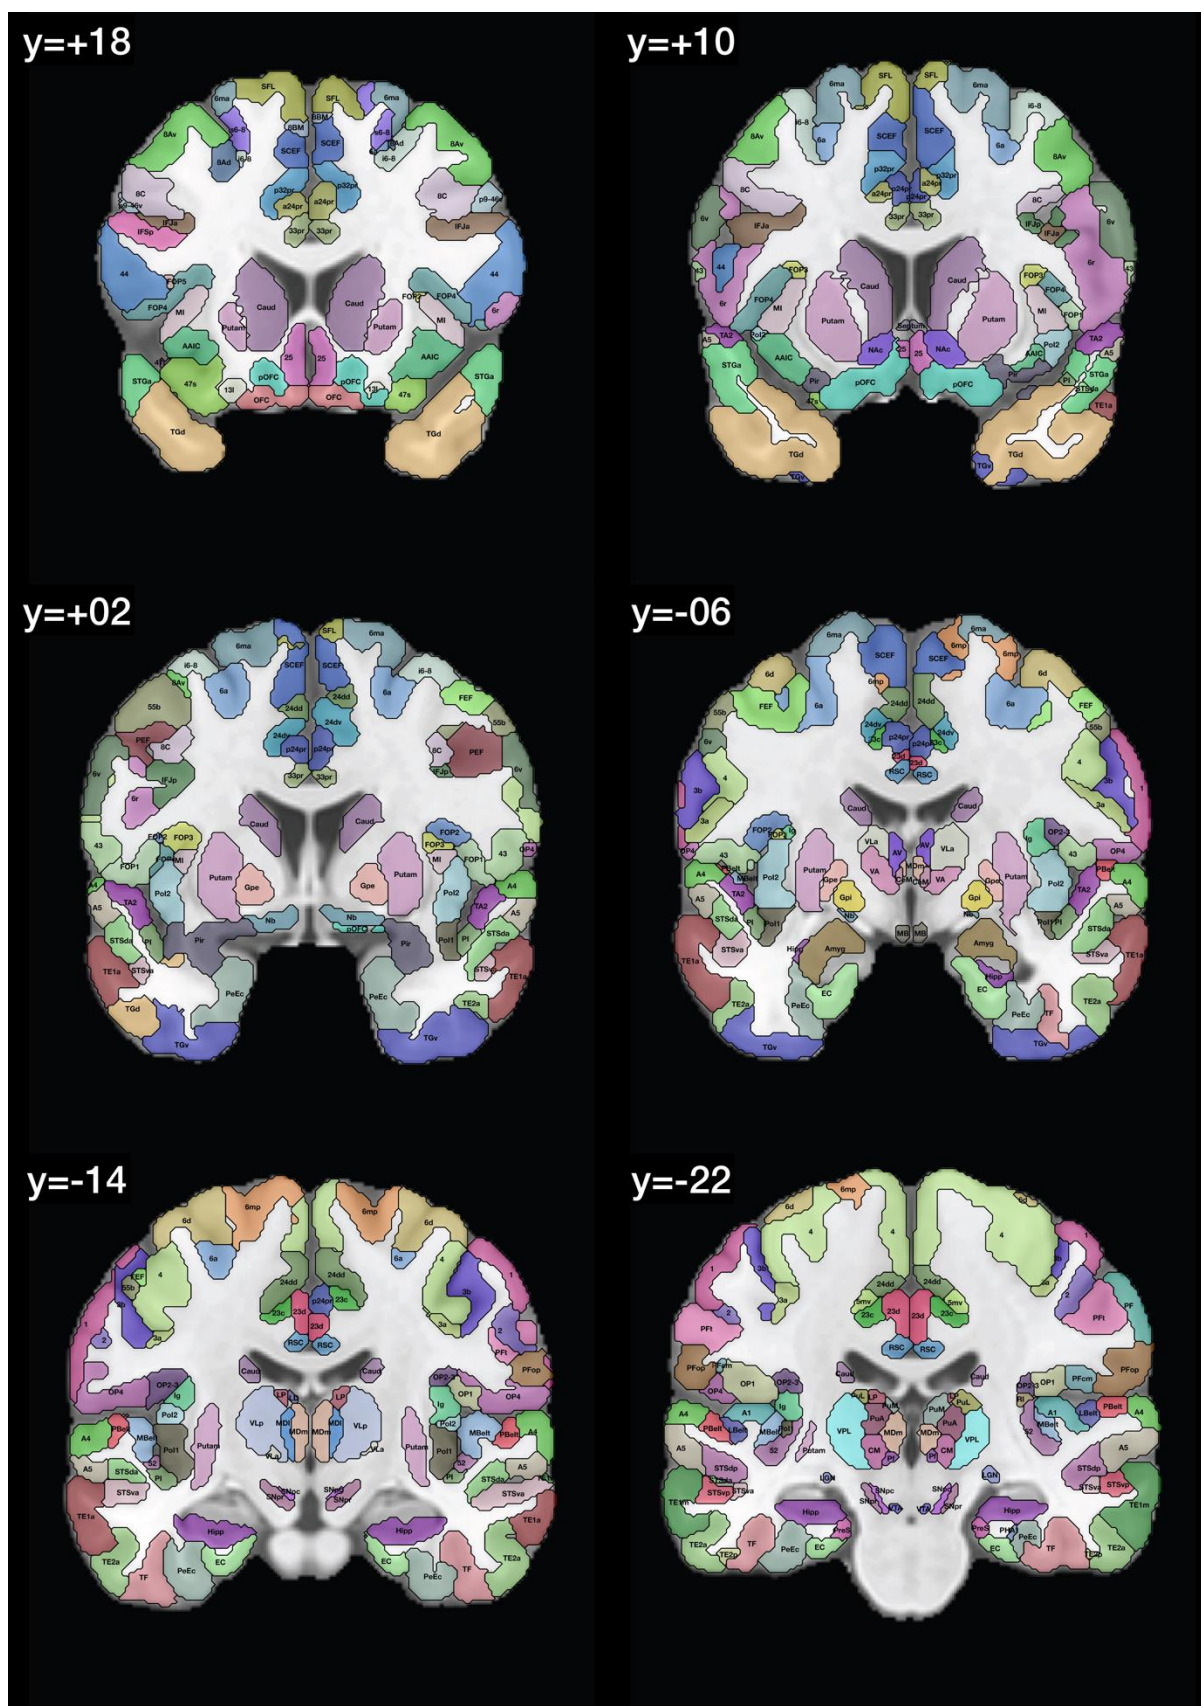

Fig. S1-3. Example coronal slices showing regions defined in the HCPex atlas and added subcortical regions (Huang *et al.* 2022). The abbreviations are as in Table S1. The y values for the coronal slices are in MNI coordinates.

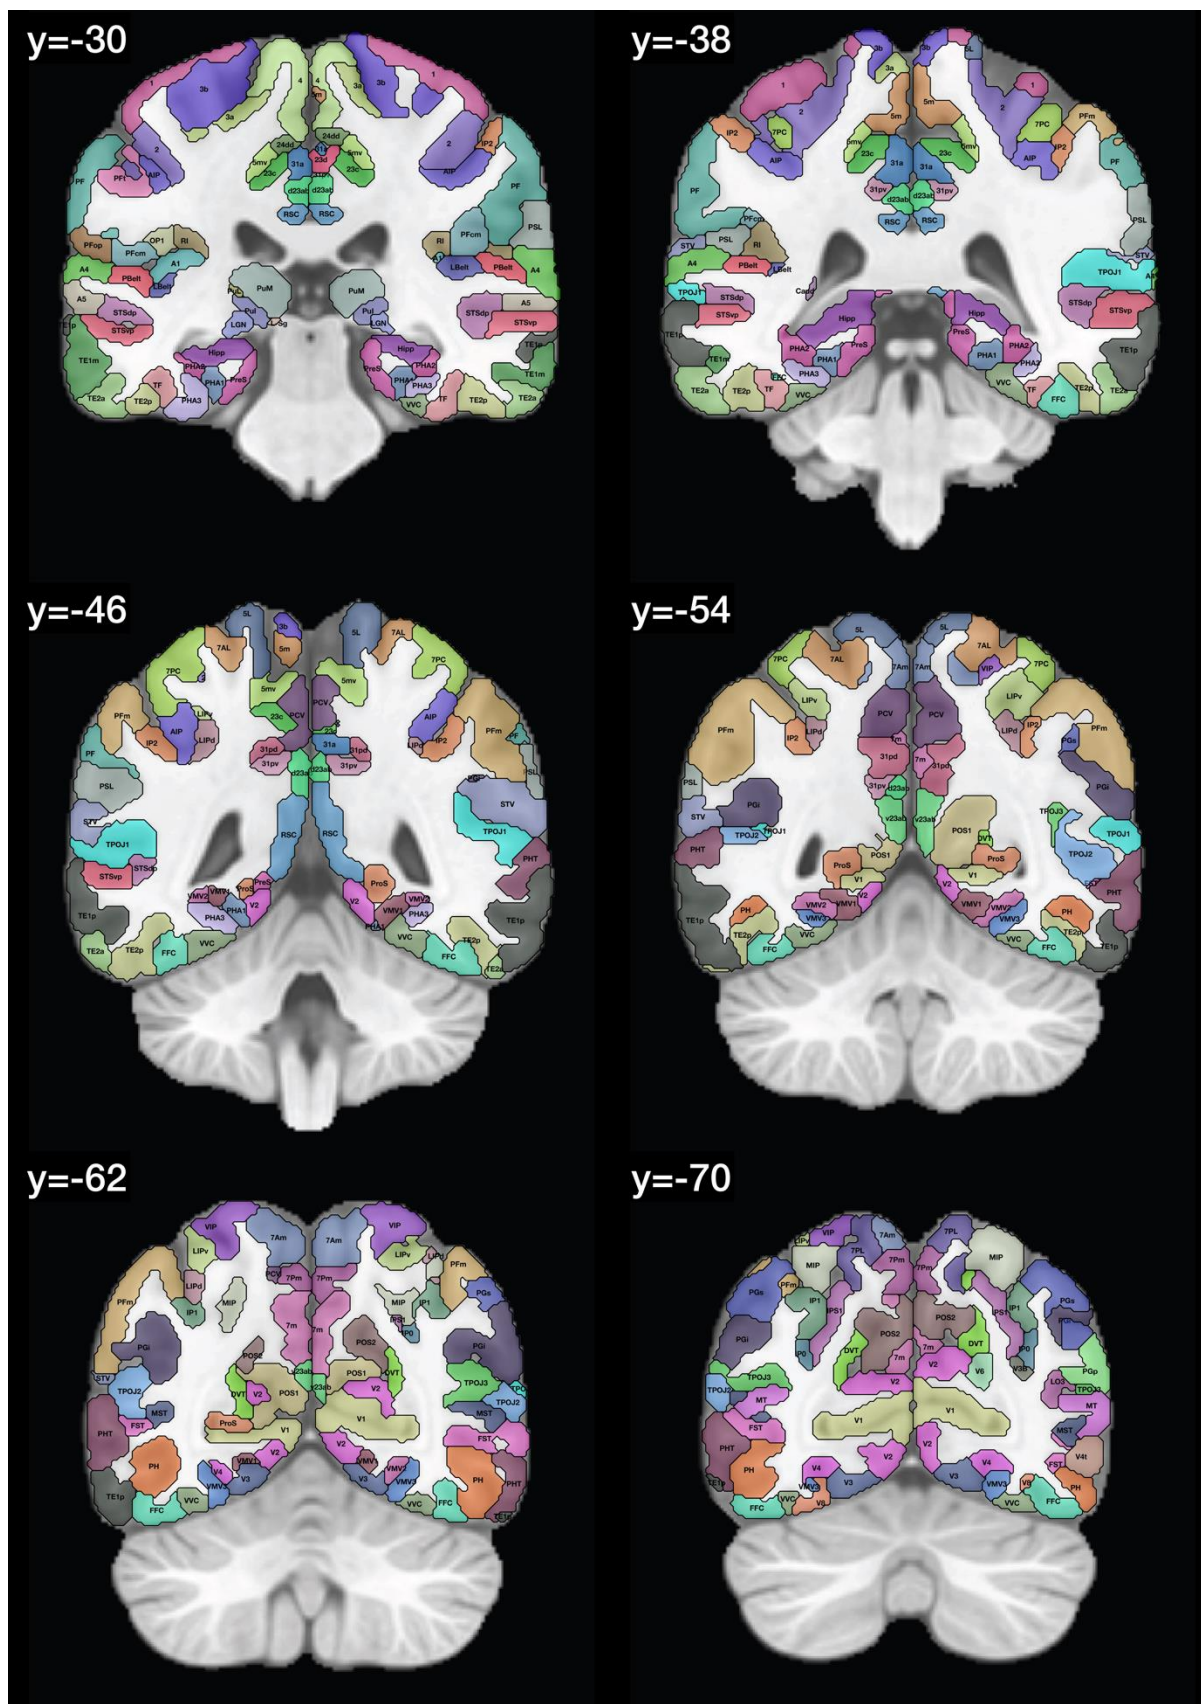

Fig. S1-4. Example coronal slices showing regions defined in the HCPex atlas and added subcortical regions (Huang *et al.* 2022). The abbreviations are as in Table S1. The y values for the coronal slices are in MNI coordinates.

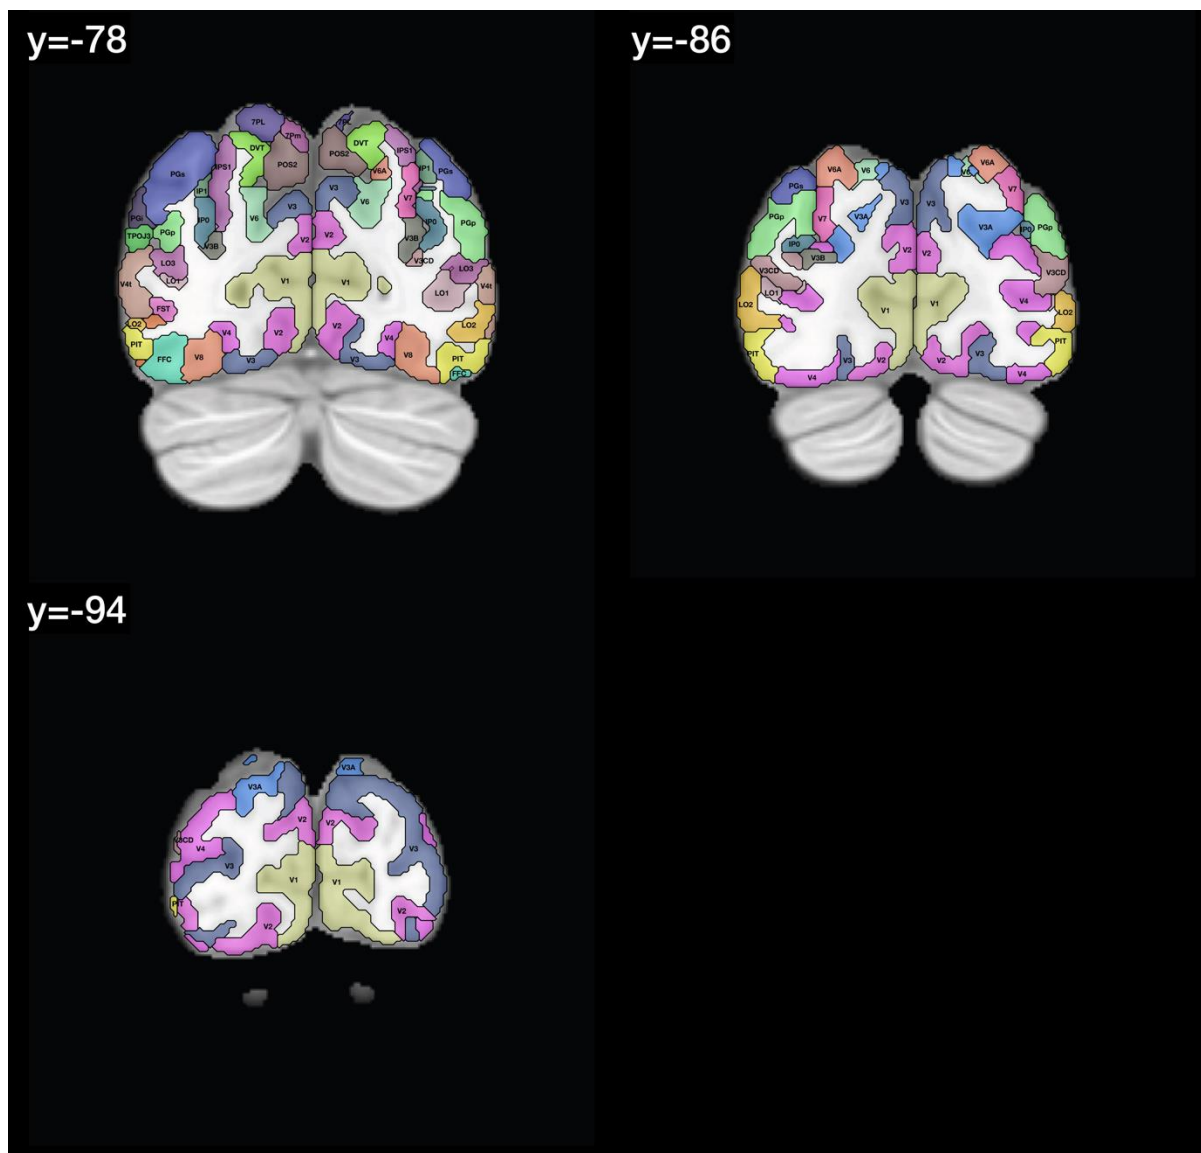

Fig. S1-5. Sagittal slices showing regions defined in the HCPex atlas (Huang, Rolls et al. (2022)) with its added subcortical regions. The abbreviations are as in Table S1. The x values for the sagittal slices are in MNI coordinates.

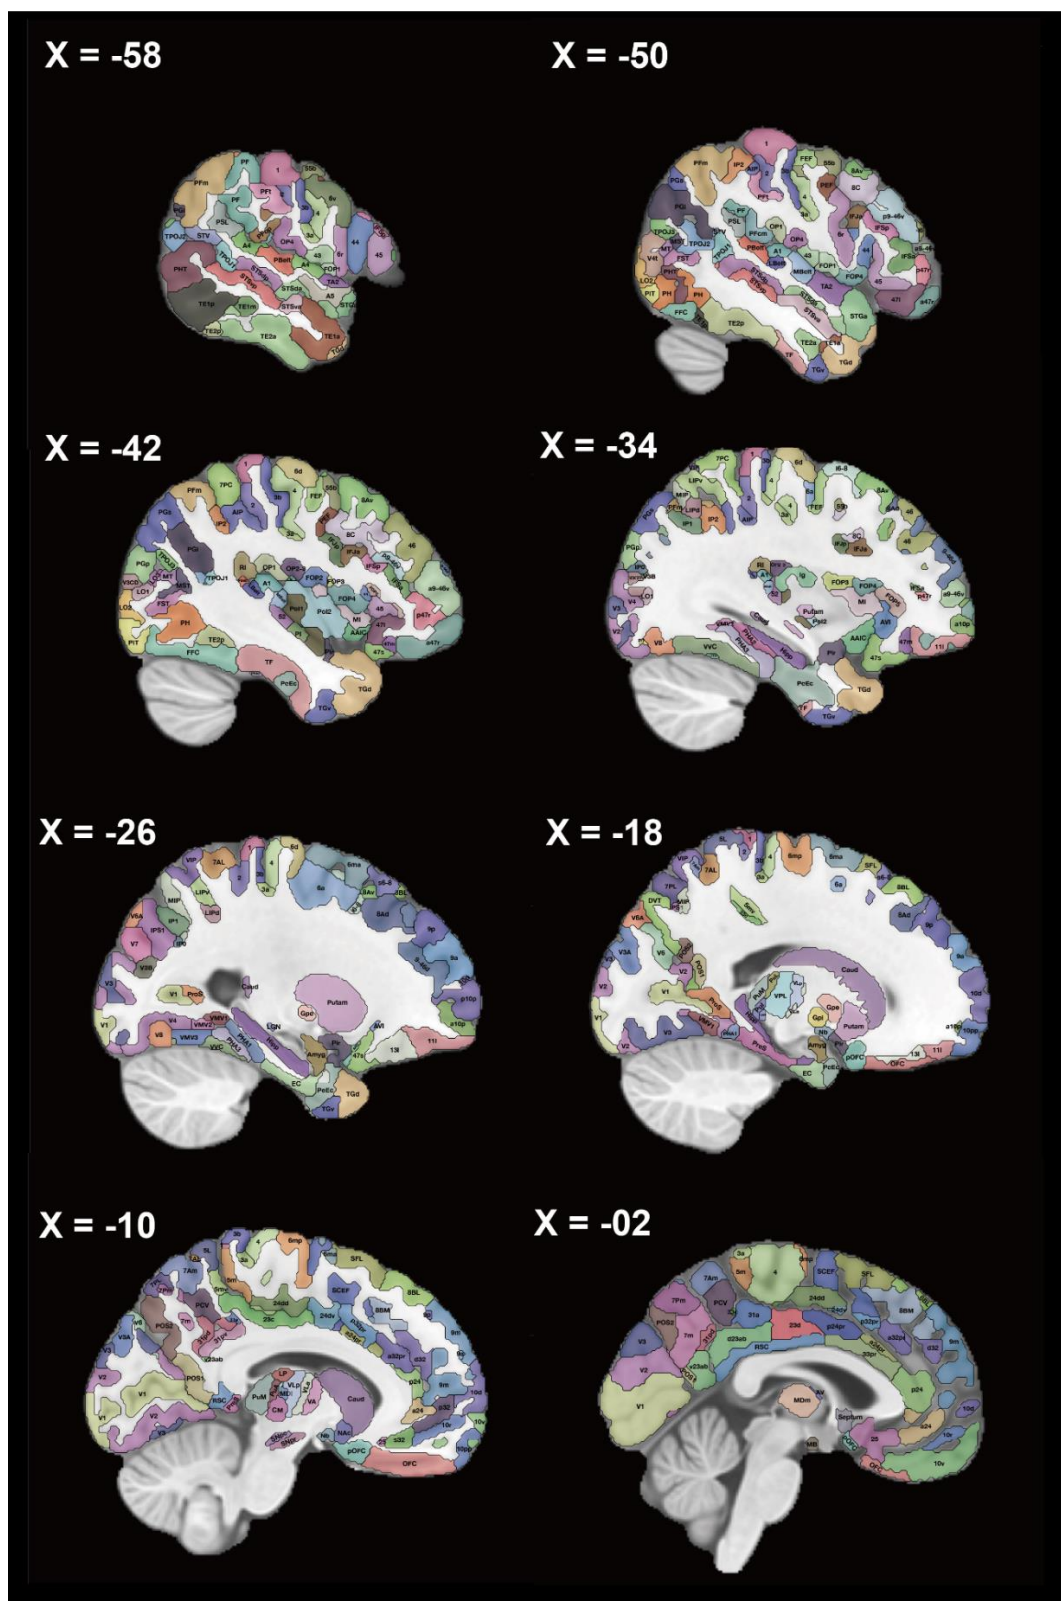

Fig. S1-6. Axial slices showing regions defined in the HCPex atlas (Huang, Rolls et al. (2022)) with its added subcortical regions. The abbreviations are as in Table S1. The z values for the axial slices are in MNI coordinates.

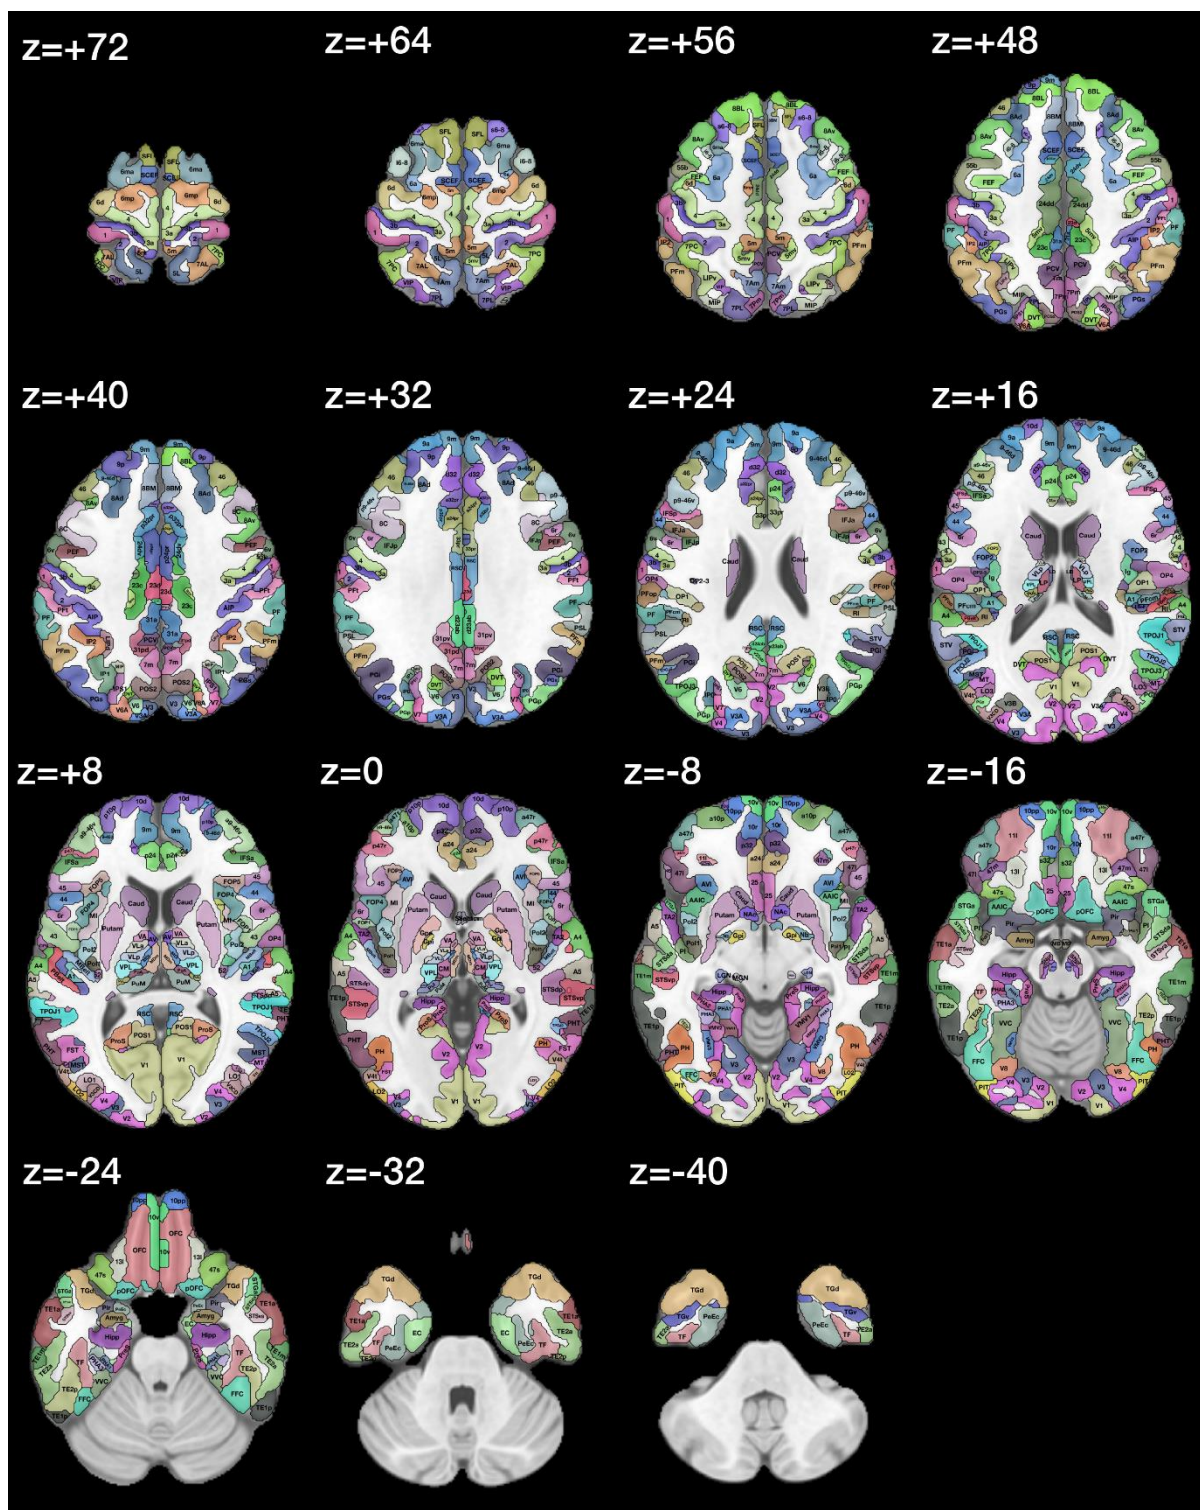

Fig. S1-7. Anatomical regions of the human visual and other cortical regions. Regions are shown as defined in the HCP-MMP atlas (Glasser *et al.* 2016), and in its extended version HCPex (Huang *et al.* 2022). The regions are shown on images of the human brain without the sulci expanded to show which cortical HCP-MMP regions are normally visible, for comparison with Fig. 1. (The ICBM153 MNI T1 image was used to prepare this figure.) Abbreviations are provided in Table S1.

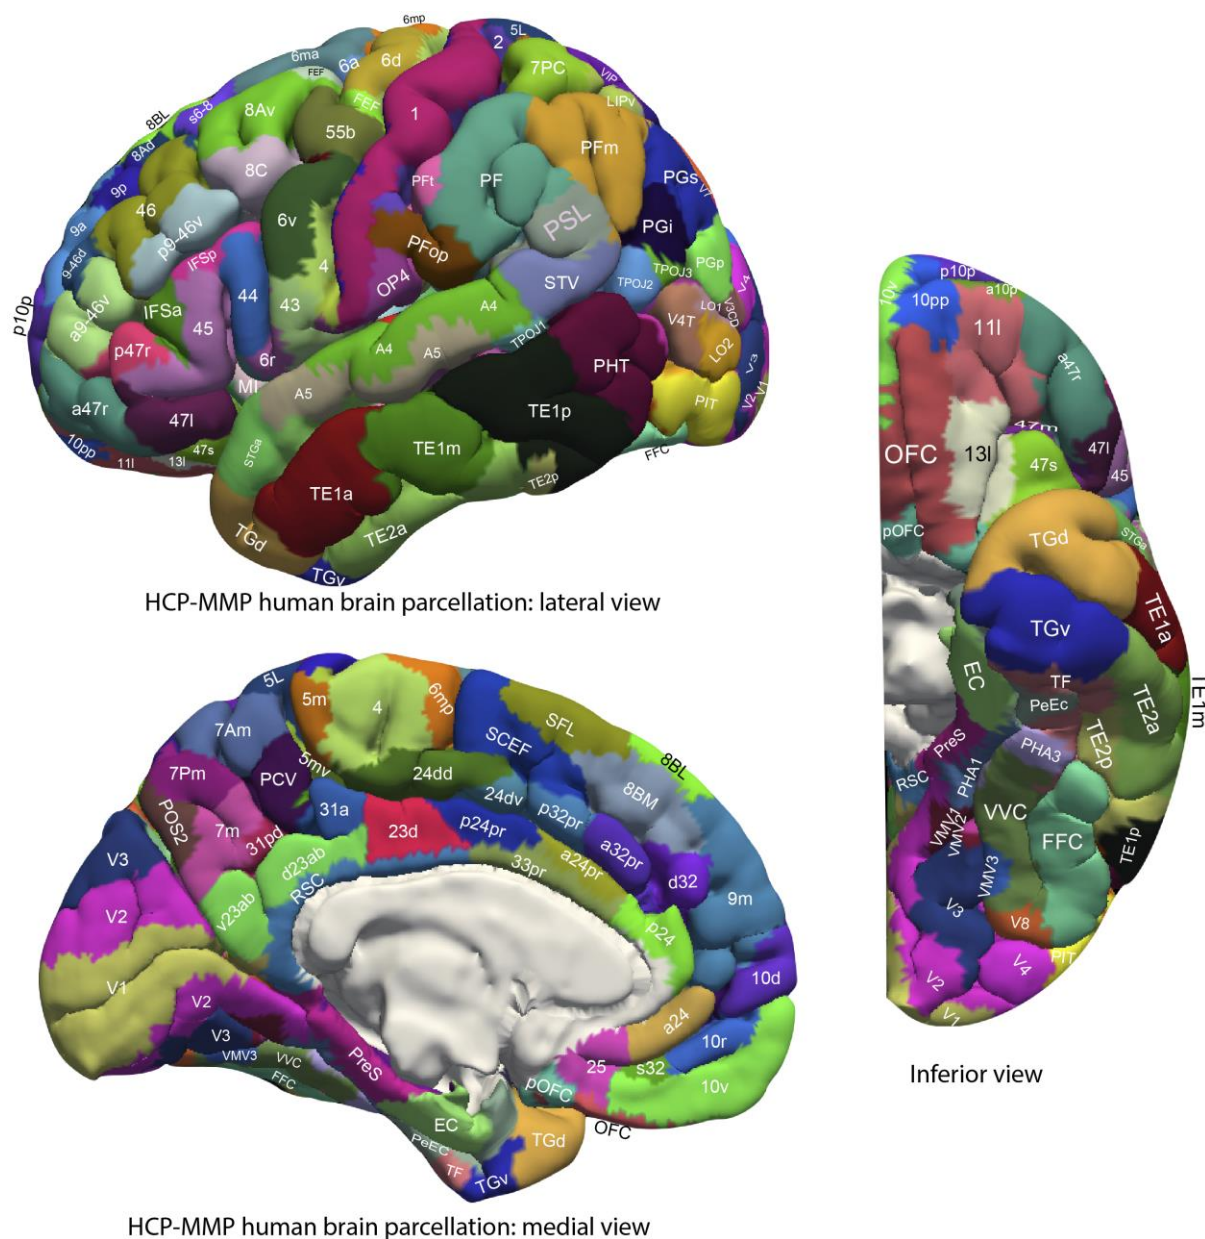

## Details of the Hopf Effective Connectivity algorithm

### Introduction

Effective connectivity measures the effect of one brain region on another, and utilizes differences detected at different times in the signals in each connected pair of brain regions to infer effects of one brain region on another. One such approach is dynamic causal modelling, but is applied most easily to activation studies, and is typically limited to measuring the effective connectivity between just a few brain areas (Friston 2009; Valdes-Sosa et al. 2011; Bajaj et al. 2016), though there have been moves to extend it to resting state studies and more brain areas (Frassle et al. 2017; Razi et al. 2017). The method used (Rolls et al. 2022b, 2022c) was developed from a Hopf algorithm to enable measurement of effective connectivity between many brain areas, described by Deco et al (2019). A principle is that the functional connectivity is measured at time  $t$  and time  $t + \tau$ , where  $\tau$  is typically 2 s to take into account the time within which a change in the BOLD signal can occur, and then the effective connectivity model is trained by error correction until it can generate the functional connectivity matrices at time  $t$  and time  $t + \tau$ . Further details of the algorithm, and the development that enabled it to measure the effective connectivity in each direction, are described next.

To measure the effective connectivity, we use a whole-brain model that allows us to simulate the BOLD activity across all brain regions and time. We use the so-called Hopf computational model, which integrates the dynamics of Stuart-Landau oscillators, to enable the activity (in this case the BOLD signal) of each brain region to be generated from the underlying effective connectivity in both directions between every pair of brain regions (Deco et al. 2017b). As mentioned above, we include in the model 362 cortical brain areas (Huang et al. 2022). The local dynamics of each brain area (node) which simulate the BOLD signal are given by Stuart-Landau oscillators which express the normal form of a supercritical Hopf bifurcation, describing the transition from noisy to oscillatory dynamics (Kuznetsov 2013). During the last years, numerous studies were able to show how the Hopf whole-brain model successfully simulates empirical electrophysiology (Freyer et al. 2011; Freyer et al. 2012), MEG (Deco et al. 2017a) and fMRI (Kringelbach et al. 2015; Deco et al. 2017b; Kringelbach and Deco 2020).

### Overview of the effective connectivity measurement algorithm

The steps of the algorithm can be summarized as follows:

1. From the empirically measured time series of the BOLD signal for each of  $N$  brain areas bandpass filtered between 0.008 and 0.08 Hz we calculate the  $N \times N$  empirical functional connectivity matrix  $FC^{\text{emp}}$  by the Pearson correlation between the time series of each pair of brain regions. We also create an  $FC^{\tau, \text{emp}}$   $N \times N$  lagged time series matrix in which the entry for each brain region is the correlation between the BOLD signal at time  $t$  and  $t + \tau$  calculated over the whole empirical time series.  $\tau$  is typically set to 2 s, a minimal useful period in the BOLD signal in which a change can be detected. The lagged correlation matrix  $FC^{\tau, \text{emp}}$  provides the delayed information that enables the effective connectivity to be measured in both directions between each pair of nodes.
2. The  $N \times N$  effective connectivity (EC) matrix to be calculated can be initialized with zeros, or with a structural connectivity matrix obtained from for example diffusion MRI. The effective connectivity matrix is read by convention from column to row, with the effective connectivity between each pair of nodes (brain regions)  $1:N$  in one direction shown in the lower left triangle, and the effective connectivity in the opposite direction in the upper right triangle. If the EC matrix is initialized with a structural connection matrix, this can have the potential advantage that nodes with no possible anatomical connection can be left at 0 and ignored in the calculations, which has the potential to increase the accuracy of the algorithm for a given number of nodes in the EC matrix, as fewer nodes need to be taken into consideration in calculating the updates to the EC matrix. If the EC matrix is initialized with zeros, this has the potential advantage that any errors in the structural connectivity matrix cannot influence the results. In practice, it has been found that with up to 360 brain areas and typical time series for the BOLD signal and structural connectivity matrices, the effective connectivity can be calculated as well with the initialization with zeros as with the structural connectivity initialization (with correlations between the ECs calculated in these two ways typically 0.99), and therefore the initialization with zeros is used in the work described, as it makes fewer assumptions.



3. The ‘natural oscillation frequency’ (or ‘intrinsic frequency’) of each brain region or node is measured as the frequency with the peak power from the power spectrum of the BOLD signal for each node.
4. A Stuart-Landau oscillatory system with the  $x$  oscillatory component for each of the  $N$  nodes (its ‘natural oscillation frequency’ measured from the BOLD signal) and the  $y$  oscillatory components provided with the same ‘natural oscillation frequency’ parameters is simulated with a Hopf model. The  $N$  oscillators are connected by the EC matrix, and noise is injected into the system so that it just oscillates. This oscillatory system is simulated to generate simulated BOLD signals for each of the  $N$  brain areas.
5. The EC matrix is then updated over a series of iterations using gradient descent. The error signal is the difference between  $FC$ , the simulated functional connectivity matrix from the current EC matrix, and  $FC^{\text{emp}}$ , the empirically measured functional connectivity matrix, together with the corresponding difference between the simulated  $FC^{\text{tau}}$  and the empirical  $FC^{\text{tau\_emp}}$  matrix.
6. The EC matrix is that which has been computed when the correlations between the simulated and empirical FC matrices, and the simulated matrix  $FC^{\text{tau}}$  and the empirical  $FC^{\text{tau\_emp}}$  are at their maximum, which are typically 0.75-0.8 after 50 iterations.

#### *The Hopf whole brain model using Stuart-Landau oscillators*

The Hopf whole-brain model, which integrates the activity of Stuart-Landau oscillators expressing the activity of each brain region  $i$  can be expressed mathematically as follows:

$$\begin{aligned} \frac{dx_i}{dt} &= \overbrace{[a_i - x_i^2 - y_i^2]x_i - \omega_i y_i}^{\text{Local Dynamics}} + \overbrace{G \sum_{j=1}^N C_{ij} (x_j - x_i)}^{\text{Coupling}} + \overbrace{\beta \eta_i(t)}^{\text{Gaussian Noise}} & (1) \\ \frac{dy_i}{dt} &= [a_i - x_i^2 - y_i^2]y_i + \omega_i x_i + G \sum_{j=1}^N C_{ij} (y_j - y_i) + \beta \eta_i(t) & (2) \end{aligned}$$

The pair  $(x_i(t), y_i(t))$  represent the state of the dynamical system modelling brain area (node)  $i$ , given its interactions with all other brain areas, at a given time  $t$ . Equations 1 and 2 describe the dynamics of this system in Cartesian coordinates, where the  $x_i(t)$  term represents the simulated BOLD signal data of brain area  $i$ . The values of  $y_i(t)$  are relevant to the dynamics of the system but are not part of the information read out from the system.

Equations 1 and 2 describe the coupling of Stuart-Landau oscillators through an effective connectivity matrix  $C$ . In these equations,  $\eta_i(t)$  provides additive Gaussian noise with standard deviation  $\beta$ . The Stuart-Landau oscillators for each brain area  $i$  expresses a Hopf normal form that has a supercritical bifurcation at  $a_i=0$ , so that if  $a_i>0$  the system has a stable limit cycle with frequency  $f_i=\omega_i/2\pi$  (where  $\omega_i$  is the angular velocity), and when  $a_i<0$  the system has a stable fixed point representing a low activity noisy state. The intrinsic frequency  $f_i$  of each Stuart-Landau oscillator corresponding to a brain area is in the 0.008–0.08 Hz band ( $i=1, \dots, 362$ ). The intrinsic frequencies are fitted from the data, as given by the frequency with the peak power of the narrowband BOLD signals of each brain region. The coupling term in Equations 1 and 2 representing the input received in node  $i$  from every other node  $j$ , is weighted by the corresponding effective connectivity  $C_{ij}$ . The coupling is the canonical diffusive coupling, which approximates the simplest (linear) part of a general coupling function (Deco *et al.* 2019).  $G$  denotes the global coupling weight, scaling equally the total input received in each brain area. With the oscillators weakly coupled, the periodic orbit of the uncoupled oscillators is preserved.

Further insight can be obtained as follows. The local dynamics of each brain area are that of a Stuart-Landau oscillator, and in Equations 1 and 2 they are shown in Cartesian coordinates. However for insight into their dynamics they can be re-expressed in polar coordinates. This is performed by taking  $r_i(t)$  to be  $\sqrt{x_i(t)^2 + y_i(t)^2}$ , which can be interpreted as the amplitude of the Stuart-Landau oscillator modelling node  $i$  at time  $t$ , and  $\theta_i(t)$  to be  $\arctan\left(\frac{y_i(t)}{x_i(t)}\right)$ , which can be interpreted as the

angle by which the oscillator for node  $i$  has rotated by time  $t$ . The coordinate transform yields the following equations for the local dynamics:  $\dot{r}_i = (a_i - r_i^2)r_i$ ,  $\dot{\theta}_i = \omega_i$ . Hence the local dynamics of each brain region have a rate of change of  $\theta$  with respect to time (a rate of oscillation) that is constant. Similarly, we see that the rate of change of amplitude with respect to time will vanish if and only if  $r_i=0$  or  $r_i = \sqrt{a_i}$ , (clearly only possible if  $a_i \geq 0$ ). On closer inspection of the equation governing  $r_i$  we see for  $a_n \leq 0$  that  $\dot{r}_i$  is strictly negative for all non-zero values of  $r_i$ , hence the system converges towards a state of no amplitude. For  $a_n > 0$  we see that for all non-zero values of  $r_i$  that  $\dot{r}_i$  is strictly negative for  $r_i > \sqrt{a_i}$  and strictly positive for  $r_i < \sqrt{a_i}$ , so all systems that are initialised with a non-zero amplitude converge to a state where  $r_i = \sqrt{a_i}$ .

To put this more formally, the system undergoes a supercritical bifurcation at  $a_i=0$ , so that if  $a_i>0$  the system has a stable limit cycle given by  $r_i = \sqrt{a_i}$ ,  $\dot{\theta}_i = \omega_i$  (with frequency  $f_i = \omega_i/2\pi$ ), and if  $a_i<0$  the system has a stable fixed point  $r_i = 0$ . However, such asymptotic stability of the model is rather unrealistic. The value of  $\beta$  in the Hopf whole-brain model is the standard deviation of the Gaussian noise, and this is chosen to be sufficiently high that for a value of  $a_i$  close to the bifurcation point, such asymptotic stability is avoided. The intrinsic frequency  $f_i$  for each brain region is determined as follows. For each brain area  $i$ , the empirical time-series data is averaged across participants and through a discrete Fourier transform the modal frequency (that with the peak power), with the exclusion of high frequency noise, is obtained and set to be the intrinsic frequency of the given brain area. The intrinsic frequency  $f_i$  of each Stuart-Landau oscillator corresponding to a brain area is in the 0.008–0.08 Hz band ( $i=1, \dots, 362$ ).

The coupling term in Equations 1 and 2 acts to align the phases and frequencies of the oscillators in connected brain regions, and represents the input received in node  $i$  from every other node  $j$  and is weighted by the corresponding effective connectivity  $C_{ij}$ . The  $(x_j - x_i)$  term acts to force the dynamics of brain region  $i$  to more closely match and indeed synchronise with brain region  $j$  (with  $C_{ij} > 0$ ).

#### *Gradient descent to optimize the effective connectivity matrix*

The effective connectivity matrix is found by gradient descent from its initial value, informed by errors in functional connectivity predictions made using the Hopf model from the current effective connectivity matrix. The gradient descent is performed in order to fit the simulated to the empirical functional connectivity (FC) pairs and the lagged FC( $\tau$ ) pairs. By this, we are able to infer a non-symmetric Effective Connectivity matrix (see Gilson et al (2016)). Note that  $FC^{\tau}$ , ie the lagged functional connectivity between pairs, lagged at  $\tau$  s, breaks the symmetry and thus is fundamental for our purpose. Specifically, we compute the distance between the simulated model FC and empirical data  $FC^{\text{emp}}$ , as well as the simulated model  $FC^{\tau}$  and data  $FC^{\tau\text{-emp}}$  and adjust each effective connection (entry in the effective connectivity matrix) separately with a gradient-descent approach. The model is run repeatedly with the updated effective connectivity until the fit converges towards a stable value. The update rule for an entry  $C_{ij}$  in the effective connectivity matrix is

$$C_{ij} = C_{ij} + \epsilon (FC_{ij}^{\text{emp}} - FC_{ij} + FC_{ij}^{\tau\text{-emp}} - FC_{ij}^{\tau}) \quad (3)$$

where  $\epsilon$  is a learning rate constant, and  $i$  and  $j$  are the nodes.

For the implementation, we set  $\tau$  to be 2 s, selecting the appropriate number of TRs to achieve this.

The convergence of the algorithm is illustrated elsewhere (Huang et al. 2021). The correlations between the empirical functional connectivities and those simulated from the estimated effective connectivities for both time  $t$  and  $t+\tau$  reach values close to 0.8.

#### *Interpretation of the effective connectivity measured by the Hopf algorithm*

If the Hopf effective connectivity algorithm is used with an anatomical connectivity mask, then the effective connectivity for anatomically unconnected nodes (brain areas) is not updated by the effective connectivity algorithm. This enables the algorithm to measure what might be termed ‘anatomical

effective connectivity’. We note that in practice the anatomical maps measured with diffusion tractography are not very sparse, so that only some links are not included in the effective connectivity map that is produced. We also note that if there are any errors in the diffusion tractography connection matrix, for example some missing anatomical connection links, then those links will not be included in the effective connectivity map.

If the Hopf effective connectivity algorithm is initialized with zeros, then all connectivities in the matrix can be updated by the algorithm. This ensures that there are no errors in the effective connectivity map that is generated by the algorithm due to any imperfections in the anatomical connection matrix. The effective connectivity calculated in this way reflects signals in one part of the brain that follow signals in another part of the brain with a time delay that is termed here  $\tau$  (*tau*), independently of whether there is a direct anatomical connection or not. This is analogous to dynamic causal modelling and most applications of Granger causality to brain connectivity (Friston et al. 2014; Bajaj *et al.* 2016; Frassle *et al.* 2017; Razi *et al.* 2017), which impose no anatomical constraints on possible pathways between the nodes, i.e. the brain regions.

In practice, we have found that with the anatomical connection map we generated using diffusion tractography (Huang *et al.* 2021), which is not very sparse, the effective connectivity matrices generated when starting with the anatomical connection matrix and the initial matrix with zeros are very similar, with typical correlations of 0.98. This is reassuring, and indicates that possible imperfections in the anatomical connection map do not produce problems in the effective connectivity matrix; and correspondingly that the Hopf effective connectivity algorithm assigns zero or close to zero effective connectivities when there is no known anatomical connection between a pair of brain regions. If a different very sparse anatomical connection matrix was used to initialize the Hopf effective connectivity algorithm, then the correlation might be lower. In practice, we prefer the initialization with the zeros in the connection matrix, as it makes fewer assumptions, but we always check the results when the algorithm is initialized with an anatomical map. Further evidence is presented elsewhere (Rolls et al. 2022a).

The effective connectivity described here estimates an effect of one brain region on another measured by time-delayed analyses. However, effective connectivity in a backward or top-down direction in a hierarchy should not be interpreted as showing that what is represented at the top of the hierarchy is transferred to lower levels (Rolls 2016, 2021, 2023). For example, face cells were discovered in the primate inferior temporal visual cortex (Perrett et al. 1979; Perrett et al. 1982; Rolls 2000) and have large receptive fields of e.g. 78° in diameter (Rolls et al. 2003), yet V1 neurons respond to bars or edges and have receptive fields that are in the order of 1° in diameter (Hubel and Wiesel 1968). Instead, the backprojections are important in computations such as memory recall and top-down attention (Rolls 2016, 2021), which although involving cortico-cortical backwards or top-down effective connectivity, do not require that what is represented high in the hierarchy is transferred to low levels in a cortico-cortical hierarchy.

#### *Validation of the Hopf Effective Connectivity algorithm*

First, the performance of the Hopf Effective Connectivity algorithm was evaluated in a brain system in which the connectivity is relatively well understood using anatomy in non-human primates. In particular, it is expected that there is a hierarchy from V1 to V2 to V3 to V4 (Felleman and Van Essen 1991; Markov et al. 2013; Markov and Kennedy 2013; Markov et al. 2014a; Markov et al. 2014b; Rolls 2016). The results for the Hopf effective connectivity algorithm applied for the first 17 visual areas in the HCP-MMP as shown in Fig. S1-8 provide evidence that the algorithm is working appropriately, with for example strong connectivity from V1 to V2, from V2 to V3, and from V3 to V4. In addition, the connectivity is generally stronger in this ‘forward’ direction between these pairs of early visual cortical regions than in the reverse direction, which is as expected given for example that the backprojections terminate generally on the apical dendrites in layer 1 far from the cell body (Markov *et al.* 2013; Markov and Kennedy 2013; Markov *et al.* 2014a; Markov *et al.* 2014b; Rolls 2016); and that the forward projection effects should dominate so the inputs from the world can proceed up the hierarchy, with the backprojections used in contrast for memory recall and top-down attention (Rolls 2016, 2021). Further, V1 connects strongly to V2, less to V3, and less to V4 (Fig. S1-8).

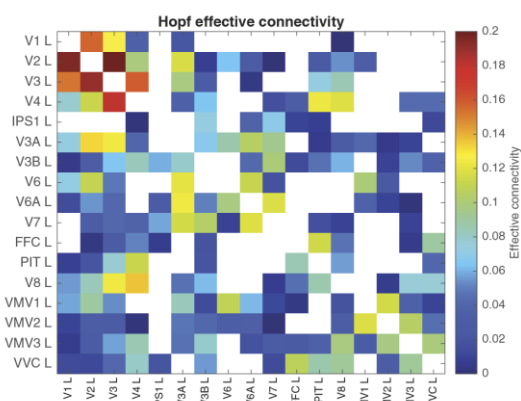

Fig S1-8. Effective connectivity matrix measured with the Hopf algorithm for the first 17 cortical regions in the HCP-MMP atlas, which are visual cortical areas, with 171 HCP participants with rsfMRI at 7T. V1-V4 are in the division “Early Visual”; IPS1-V7 in the division “Dorsal Stream Visual”; and FFC-VVC in the division “Ventral Stream Visual” as shown in Table S1.

Second, the mean effective connectivity for regions within a hemisphere is greater than the mean effective connectivity for regions to the contralateral regions, with the ratio for the contralateral to ipsilateral visual cortical regions 63%, and for language regions which are expected to be more lateralised 24% (Rolls *et al.* 2022a). This is as expected, given the typical specialization of the left hemisphere for language.

Third, a feature of the effective connectivities is that they are generally strongest to the exact corresponding brain region contralaterally. This is illustrated in Figs. S2 and S3 for most of the visual cortical regions. This attests to the efficacy of the effective connectivity algorithm, for it detects corresponding particular brain regions in the contralateral hemisphere, from all the 180 brain regions in the contralateral hemisphere.

Fourth, in all cases the 360x360 effective connectivity matrix could be used to generate by simulation 360x360 functional connectivity matrices for time  $t$  and time  $t + \tau$  that were correlated 0.8 or more with the empirically measured functional connectivity matrices at time  $t$  and time  $t + \tau$  using fMRI.

Fifth, the effective connectivity matrices were robust with respect to the number of participants, in that when the 171 participants were separated into two groups of 85, the correlation between the effective connectivities measured for each group independently was 0.98.

Sixth, the directionality of the effective connectivity was verified as shown in Fig. S1-8, (where for example the connectivity is stronger from V1 to V2 than vice versa, from V1 to V4 than vice versa, from V4 to VVC and VMV3 than vice versa). The directionality was also confirmed by analysis of the connectivity between the thalamus and cortex, which for the main thalamic nuclei was greater from thalamus to cortex than vice versa. For example, the connectivity of the medial geniculate nucleus to auditory cortical regions shown in Fig. 1b was much greater than in the reverse direction from cortex to thalamus.



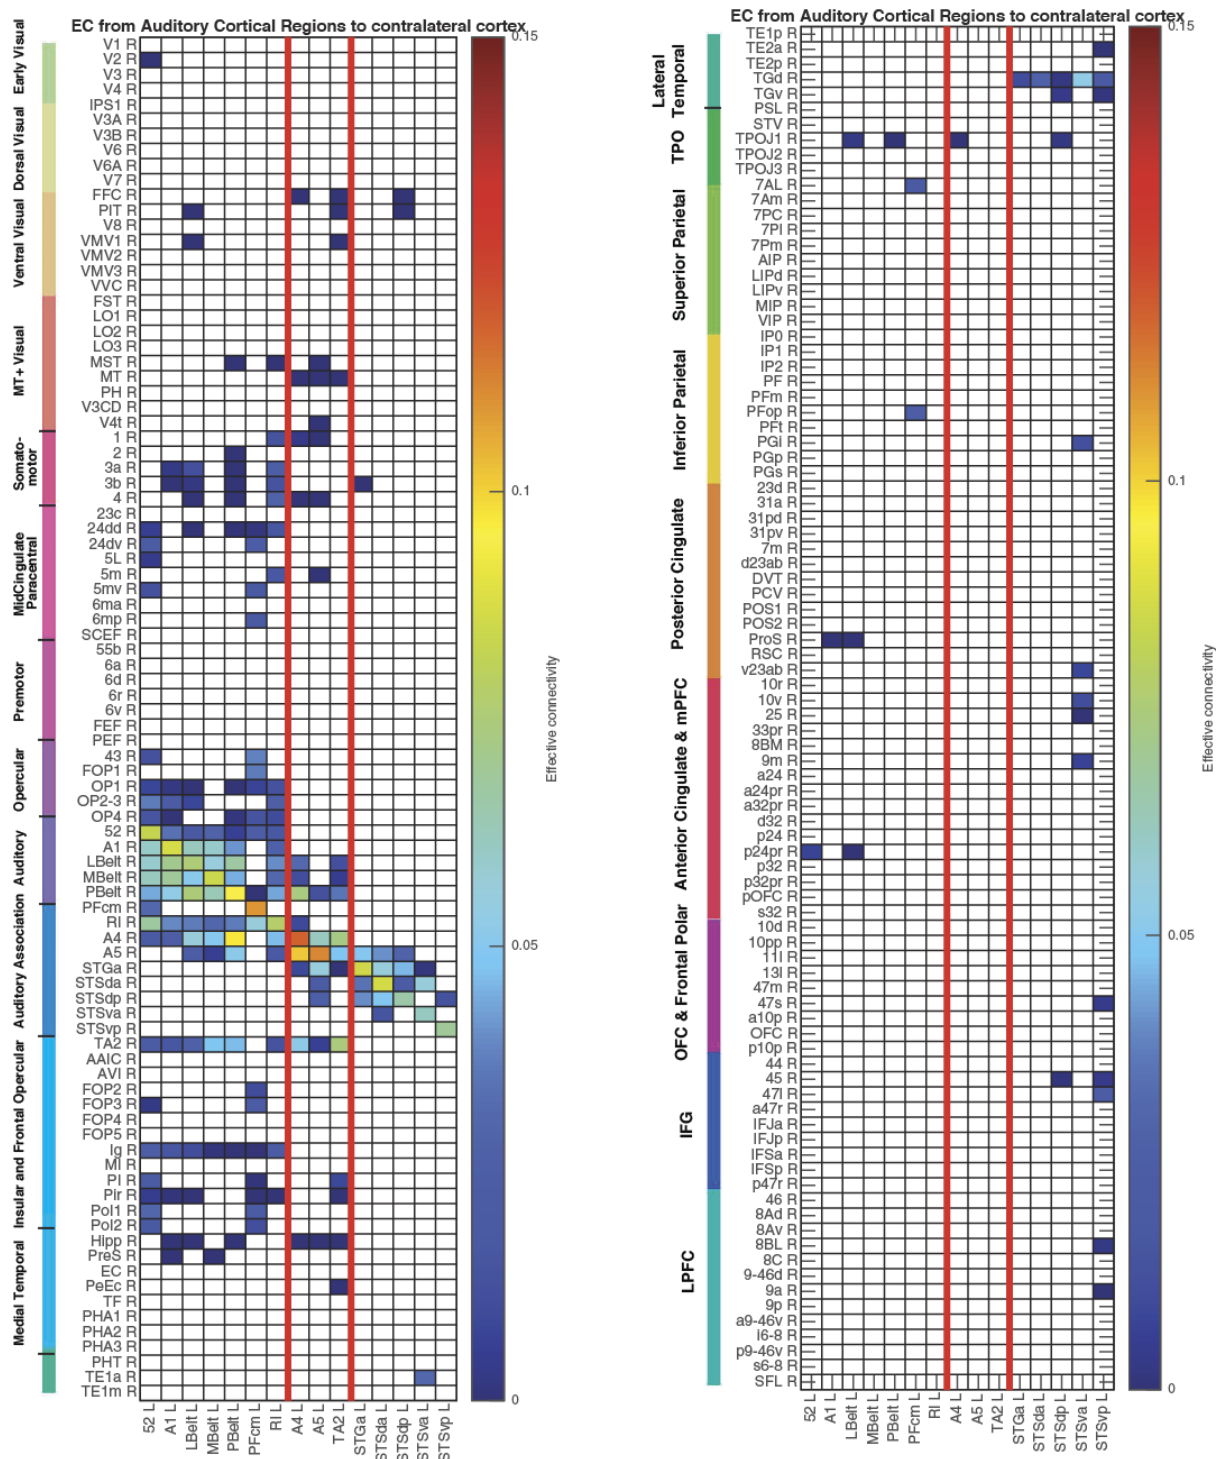

Fig. S3. Effective connectivity (EC) from the Left Auditory Cortical Regions to all 180 cortical areas in the Right hemisphere. All effective connectivities greater than 0 are shown, and effective connectivities of 0 are shown as a blank. The connectivities to the first set of cortical regions are shown on the left, and to the second set on the right. Conventions: see Fig. 2. Abbreviations: see Table S1. The effective connectivity is read from column to row.

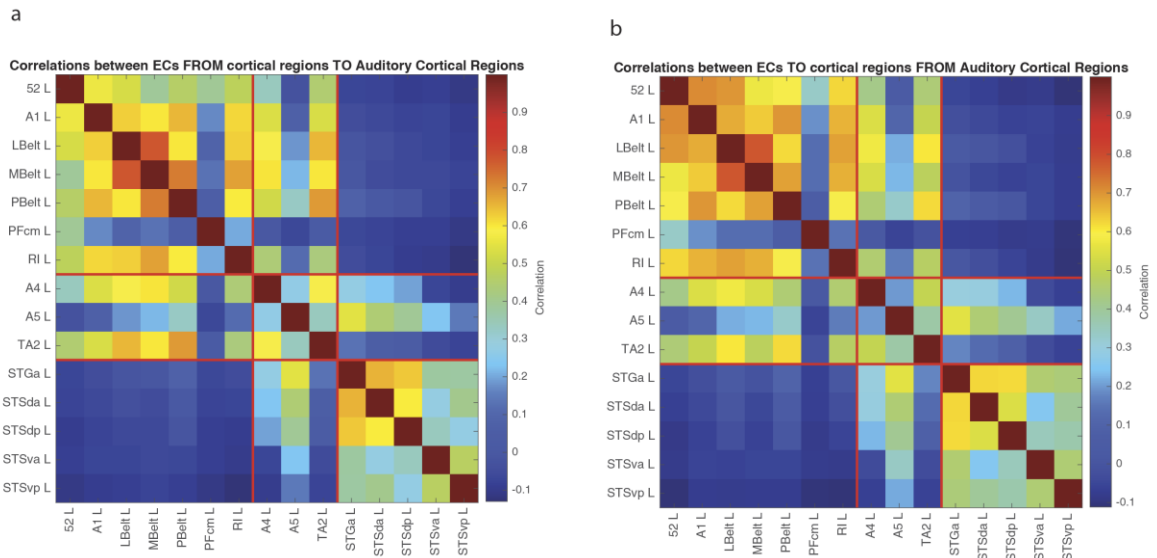

Fig. S4. a. Correlations between the effective connectivities TO cortical regions FROM different Auditory Cortical Regions. b. Correlations between the effective connectivities FROM cortical regions TO different Visual Cortical Regions. Abbreviations: see Table S1. Grouping conventions for the red lines as in Fig. 2.

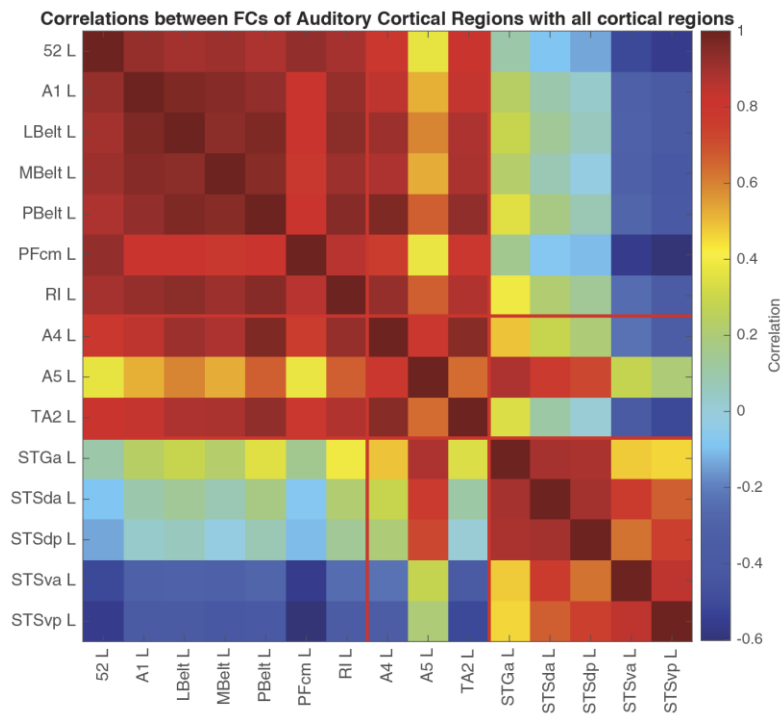

Fig. S5. Correlations between the functional connectivities with all cortical regions for the Auditory Cortical Regions. Abbreviations: see Table S1. Grouping conventions for the red lines as in Fig. 2.



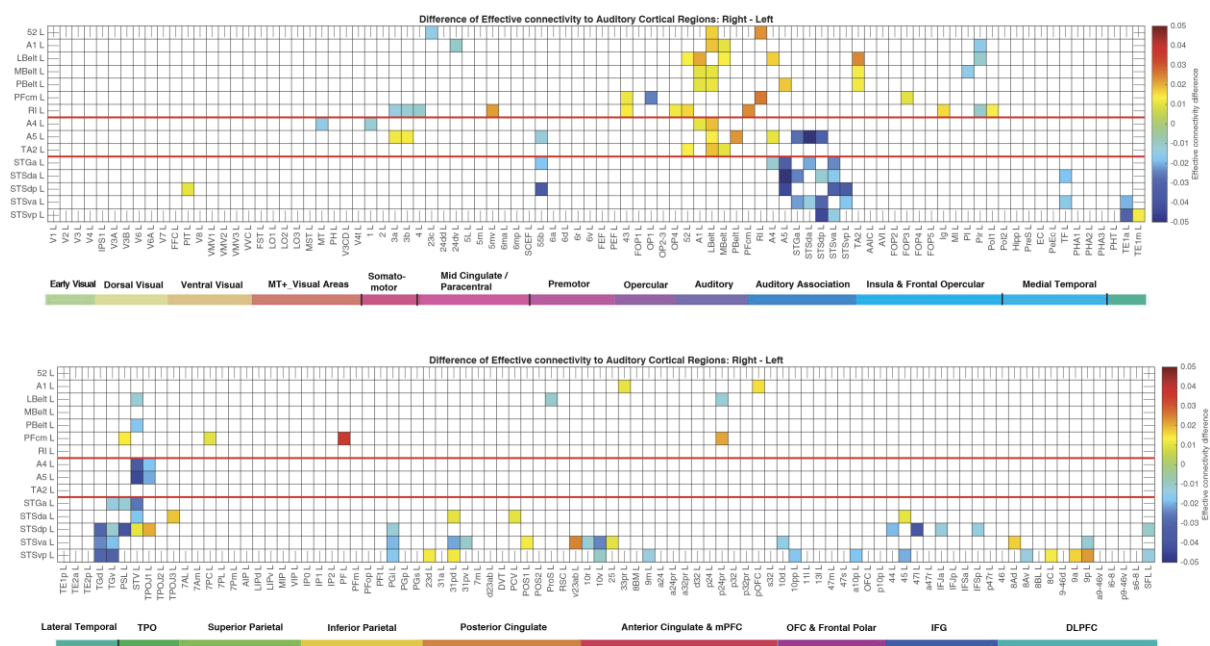

**Fig. S6. Effective connectivity differences right hemisphere – left hemisphere *TO* the auditory cortical regions (the rows) *FROM* 180 cortical areas (the columns) in the left hemisphere.** The effective connectivity difference is read from column to row. Effective connectivity differences in the range -0.01 to 0.01 are shown as blank. Thus a red color in the matrix reflects a stronger effective connectivity for that link in the right hemisphere. Abbreviations: see Table S1.

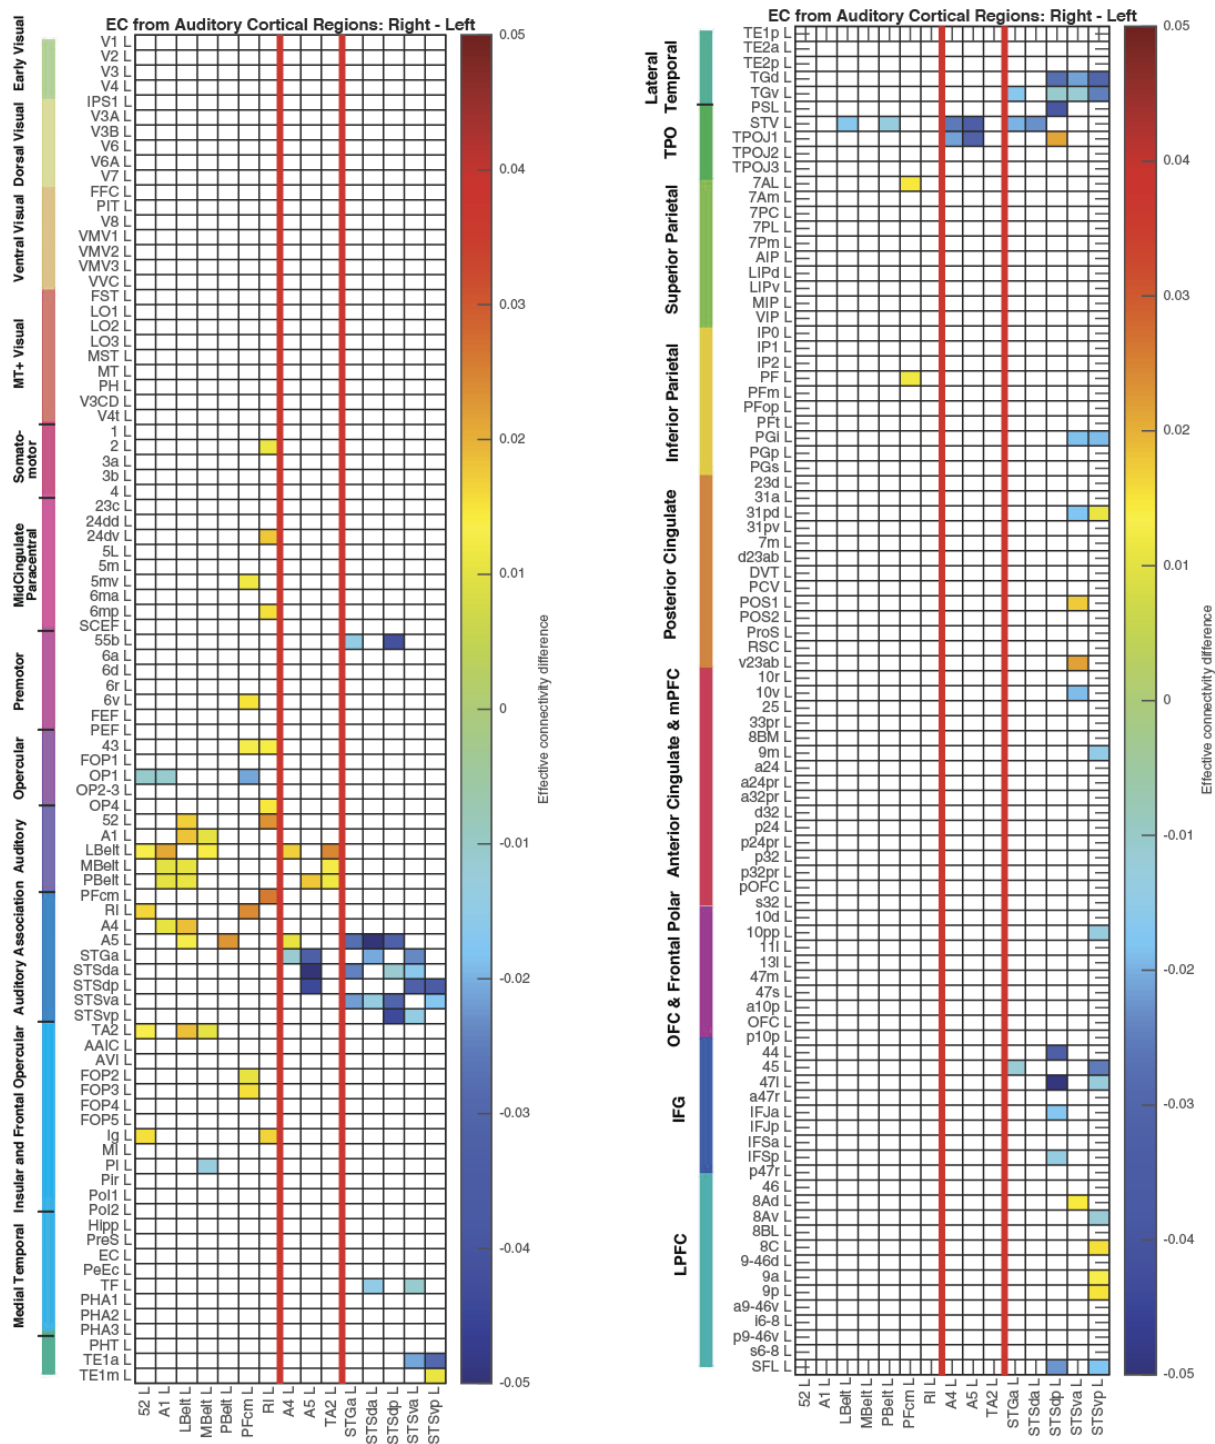

**Fig. S7. Effective connectivity difference right hemisphere – left hemisphere *FROM* the Auditory Cortical Regions *TO* 180 cortical areas in the left hemisphere.** The effective connectivity difference is read from column to row. Effective connectivity differences in the range -0.01 to 0.01 are shown as blank. Abbreviations: see Table S1. Conventions: see Fig. 2.

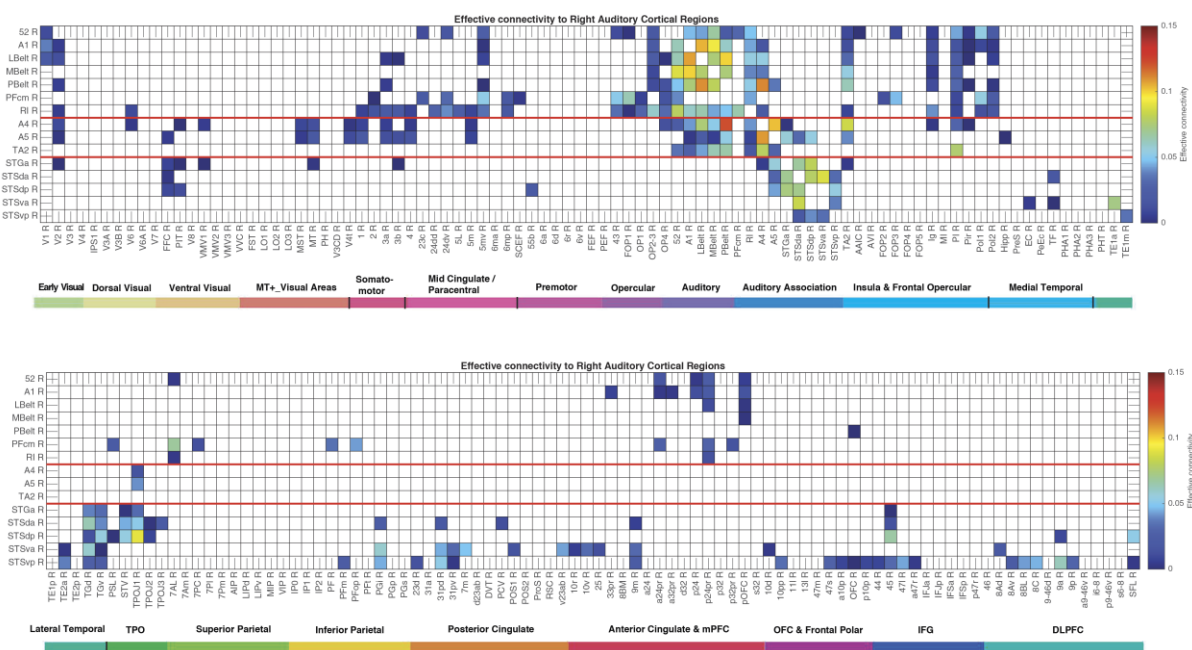

**Fig. S8. Effective connectivity *TO* auditory cortical regions (the rows) *FROM* 180 cortical areas (the columns) in the right hemisphere.** The effective connectivity is read from column to row. Effective connectivities of 0 are shown as blank. All effective connectivity maps are scaled to show 0.15 as the maximum, as this is the highest effective connectivity found between this set of brain regions. The effective connectivity scale has been set to have a maximum of 0.15 as that is the range for the auditory regions, with the maximum value of 0.2 set by the connectivity between V1L and V2L. The regions above the upper red line are in the HCP-MMP ‘Early Auditory’ division; between the two red lines are in the ‘Auditory Association’ division; and below the lower red line are for the cortex in and related to the superior temporal sulcus (STS). The effective connectivity for the first set of cortical regions is shown in the top panel; and for the second set of regions in the lower panel. Abbreviations: see Table S1. The coloured labelled bars show the cortical divisions in the HCP-MMP atlas (Glasser *et al.* 2016). The order of the cortical regions is that in Huang, Rolls *et al.* (2022).

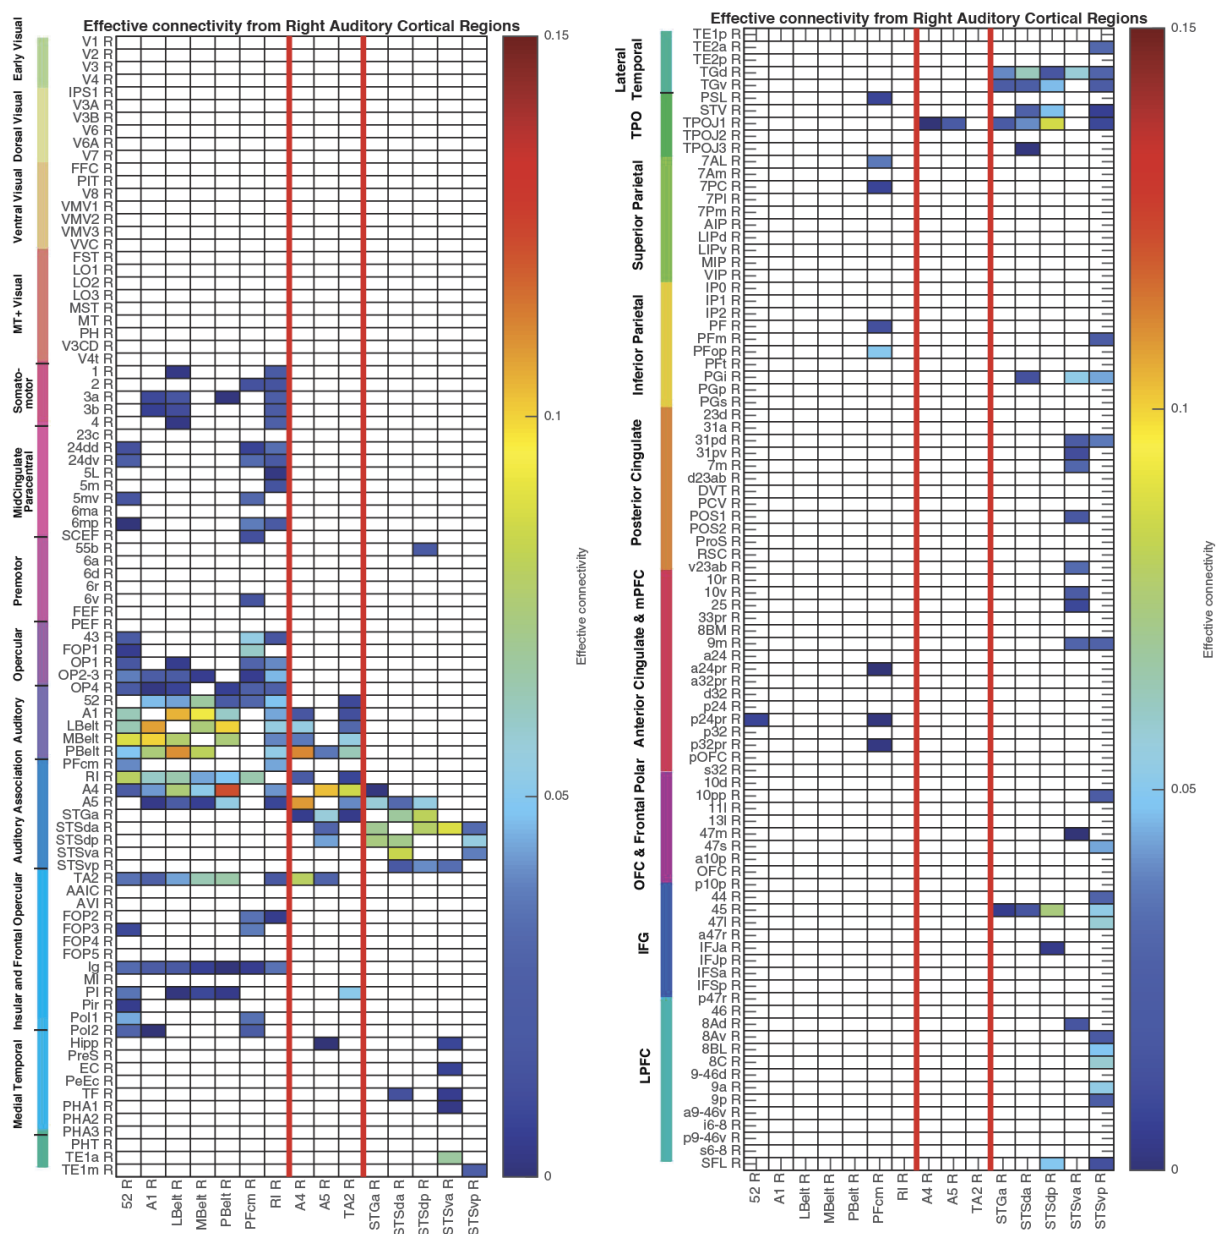

**Fig. S9. Effective connectivity *FROM* the Auditory Cortical Regions *TO* 180 cortical areas in the Right hemisphere.** The effective connectivity is read from column to row. Effective connectivities of 0 are shown as blank. Abbreviations: see Table S1. The groups of auditory cortex regions are separated by red lines.

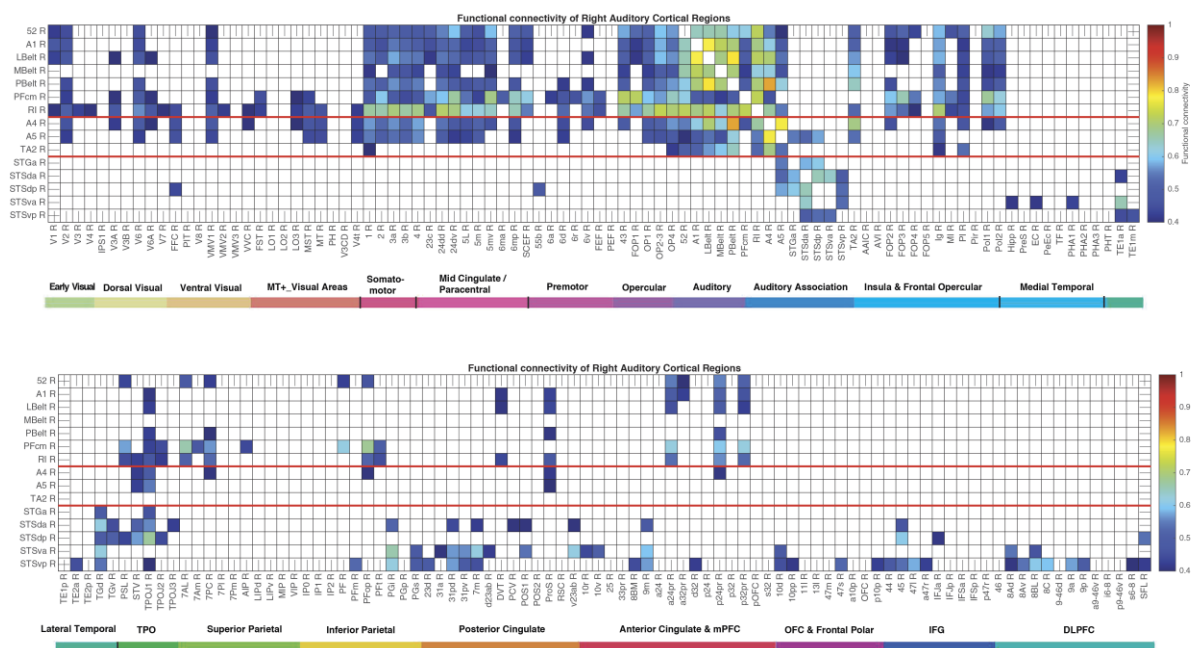

**Fig. S10. Functional connectivity between auditory cortical regions and 180 other cortical regions in the right hemisphere.** Functional connectivities less than 0.4 are shown as blank. The upper figure shows the functional connectivity of the auditory cortical regions with the first half of the cortical regions; the lower figure shows the functional connectivity with the second half of the cortical regions. Abbreviations: see Table S1. Conventions as in Fig. 2.

## References

- Bajaj S, Adhikari BM, Friston KJ, Dhamala M. 2016. Bridging the gap: Dynamic Causal Modeling and Granger Causality analysis of resting state functional magnetic resonance imaging. *Brain Connect* 6: 652-661.
- Deco G, Cabral J, Woolrich MW, Stevner ABA, van Hartevelt TJ, Kringelbach ML. 2017a. Single or multiple frequency generators in on-going brain activity: A mechanistic whole-brain model of empirical MEG data. *Neuroimage* 152: 538-550.
- Deco G, Kringelbach ML, Jirsa VK, Ritter P. 2017b. The dynamics of resting fluctuations in the brain: metastability and its dynamical cortical core. *Sci Rep* 7: 3095.
- Deco G, Cruzat J, Cabral J, Tagliazucchi E, Laufs H, Logothetis NK, Kringelbach ML. 2019. Awakening: Predicting external stimulation to force transitions between different brain states. *Proceedings of the National Academy of Sciences* 116: 18088-18097.
- Felleman DJ, Van Essen DC. 1991. Distributed hierarchical processing in the primate cerebral cortex. *Cereb Cortex* 1: 1-47.
- Frassle S, Lomakina EI, Razi A, Friston KJ, Buhmann JM, Stephan KE. 2017. Regression DCM for fMRI. *Neuroimage* 155: 406-421.
- Freyer F, Roberts JA, Becker R, Robinson PA, Ritter P, Breakspear M. 2011. Biophysical mechanisms of multistability in resting-state cortical rhythms. *J Neurosci* 31: 6353-6361.
- Freyer F, Roberts JA, Ritter P, Breakspear M. 2012. A canonical model of multistability and scale-invariance in biological systems. *PLoS Comput Biol* 8: e1002634.
- Friston K. 2009. Causal modelling and brain connectivity in functional magnetic resonance imaging. *PLoS Biol* 7: e33.
- Friston KJ, Kahan J, Biswal B, Razi A. 2014. A DCM for resting state fMRI. *Neuroimage* 94: 396-407.
- Gilson M, Moreno-Bote R, Ponce-Alvarez A, Ritter P, Deco G. 2016. Estimation of directed effective connectivity from fMRI functional connectivity hints at asymmetries in the cortical connectome. *PLoS Comput Biol* 12: e1004762.
- Glasser MF, Coalson TS, Robinson EC, Hacker CD, Harwell J, Yacoub E, Ugurbil K, Andersson J, Beckmann CF, Jenkinson M, Smith SM, Van Essen DC. 2016. A multi-modal parcellation of human cerebral cortex. *Nature* 536: 171-178.
- Huang C-C, Rolls ET, Hsu C-CH, Feng J, Lin C-P. 2021. Extensive cortical connectivity of the human hippocampal memory system: beyond the "what" and "where" dual-stream model. *Cereb Cortex* 31: 4652-4669.
- Huang CC, Rolls ET, Feng J, Lin CP. 2022. An extended Human Connectome Project multimodal parcellation atlas of the human cortex and subcortical areas. *Brain Struct Funct* 227: 763-778.
- Hubel DH, Wiesel TN. 1968. Receptive fields and functional architecture of macaque monkey striate cortex. *J Physiol* 195: 215-243.
- Kringelbach ML, McIntosh AR, Ritter P, Jirsa VK, Deco G. 2015. The rediscovery of slowness: exploring the timing of cognition. *Trends Cogn Sci* 19: 616-628.
- Kringelbach ML, Deco G. 2020. Brain states and transitions: insights from computational neuroscience. *Cell Rep* 32: 108128.
- Kuznetsov YA. 2013. Elements of applied bifurcation theory. New York: Springer Science and Business Media.
- Markov NT, Ercsey-Ravasz M, Van Essen DC, Knoblauch K, Toroczkai Z, Kennedy H. 2013. Cortical high-density counterstream architectures. *Science* 342: 1238406.
- Markov NT, Kennedy H. 2013. The importance of being hierarchical. *Curr Opin Neurobiol* 23: 187-194.
- Markov NT, Ercsey-Ravasz MM, Ribeiro Gomes AR, Lamy C, Magrou L, Vezoli J, Misery P, Falchier A, Quilodran R, Gariel MA, Sallet J, Gamanut R, Huissoud C, Clavagnier S, Giroud P, Sappey-Marinié D, Barone P, Dehay C, Toroczkai Z, Knoblauch K, Van Essen DC, Kennedy H. 2014a. A weighted and directed interareal connectivity matrix for macaque cerebral cortex. *Cereb Cortex* 24: 17-36.

- 
- Markov NT, Vezoli J, Chameau P, Falchier A, Quilodran R, Huissoud C, Lamy C, Misery P, Giroud P, Ullman S, Barone P, Dehay C, Knoblauch K, Kennedy H. 2014b. Anatomy of hierarchy: feedforward and feedback pathways in macaque visual cortex. *J Comp Neurol* 522: 225-259.
- Perrett DI, Rolls ET, Caan W. 1979. Temporal lobe cells of the monkey with visual responses selective for faces. *Neurosci Lett* S3: S358.
- Perrett DI, Rolls ET, Caan W. 1982. Visual neurons responsive to faces in the monkey temporal cortex. *Exp Brain Res* 47: 329-342.
- Razi A, Seghier ML, Zhou Y, McColgan P, Zeidman P, Park HJ, Sporns O, Rees G, Friston KJ. 2017. Large-scale DCMs for resting-state fMRI. *Netw Neurosci* 1: 222-241.
- Rolls ET. 2000. Functions of the primate temporal lobe cortical visual areas in invariant visual object and face recognition. *Neuron* 27: 205-218.
- Rolls ET, Aggelopoulos NC, Zheng F. 2003. The receptive fields of inferior temporal cortex neurons in natural scenes. *J Neurosci* 23: 339-348.
- Rolls ET. 2016. *Cerebral Cortex: Principles of Operation*. Oxford: Oxford University Press.
- Rolls ET. 2021. *Brain Computations: What and How*. Oxford: Oxford University Press.
- Rolls ET, Deco G, Huang C-C, Feng J. 2022a. The human language effective connectome. *Neuroimage* 258: 119352.
- Rolls ET, Deco G, Huang CC, Feng J. 2022b. The human orbitofrontal cortex, vmPFC, and anterior cingulate cortex effective connectome: emotion, memory, and action. *Cereb Cortex*: doi: 10.1093/cercor/bhac1070.
- Rolls ET, Deco G, Huang CC, Feng J. 2022c. The effective connectivity of the human hippocampal memory system. *Cereb Cortex* 32: 3706-3725.
- Rolls ET. 2023. *Brain Computations and Connectivity*. Oxford: Oxford University Press.
- Valdes-Sosa PA, Roebroeck A, Daunizeau J, Friston K. 2011. Effective connectivity: influence, causality and biophysical modeling. *Neuroimage* 58: 339-361.
